1 Short title: The genetics of intracellular ROS signalling.

2 **Methyl viologen can affect mitochondrial function in Arabidopsis.**

3 Fuqiang Cui <sup>1,7</sup>, Mikael Brosché <sup>1,2</sup>, Alexey Shapiguzov <sup>1,3</sup>, Xin-Qiang He <sup>1,4</sup>, Julia P.  
4 Vainonen<sup>1</sup>, Johanna Leppälä <sup>1</sup>, Andrea Trotta <sup>5</sup>, Saijaliisa Kangasjärvi <sup>5</sup>, Jarkko Salojärvi <sup>1,6</sup>,  
5 Jaakko Kangasjärvi <sup>1</sup> and Kirk Overmyer <sup>1,\*</sup>

6

7 <sup>1</sup> Organismal and Evolutionary Biology Research Program, Faculty of Biological and  
8 Environmental Sciences, and Viikki Plant Science Centre, University of Helsinki, P.O Box 65  
9 (Viikinkaari 1), FI-00014 Helsinki, Finland.

10 <sup>2</sup> Institute of Technology, University of Tartu, Nooruse 1, Tartu 50411, Estonia.

11 <sup>3</sup> Institute of Plant Physiology, Russian Academy of Sciences, 127276 Moscow, Russia

12 <sup>4</sup> College of Life Sciences, Peking University, Beijing 100871, China.

13 <sup>5</sup> Molecular Plant Biology, Department of Biochemistry and Food Chemistry, University of  
14 Turku, Turku, Finland.

15 <sup>6</sup> Population Genomics and System Biology, School of Biological Sciences, Nanyang  
16 Technological University, Singapore.

17 <sup>7</sup> Current address: School of Forest Biotechnology, Zhejiang Agriculture & Forestry  
18 University, Hangzhou, China.

19

20 \*Address correspondence to: email: [kirk.overmyer@helsinki.fi](mailto:kirk.overmyer@helsinki.fi)

21

22

23

24

25

26

27

28

29

30

31

32

33

## 34 Abstract

35 Reactive oxygen species (ROS) are key signalling intermediates in plant metabolism,  
36 defence, and stress adaptation. The chloroplast and mitochondria are centres of  
37 metabolic control and ROS production, which coordinate stress responses in other cell  
38 compartments. The herbicide and experimental tool, methyl viologen (MV) induces  
39 ROS generation in the chloroplast under illumination, but is also toxic in non-  
40 photosynthetic organisms. We used MV to probe plant ROS signalling in compartments  
41 other than the chloroplast. Taking a genetic approach in *Arabidopsis thaliana*, we used  
42 natural variation, QTL mapping, and mutant studies with MV in the light, but also under  
43 dark conditions, when the chloroplast electron transport is inactive. These studies  
44 revealed a light-independent MV-induced ROS-signalling pathway, suggesting  
45 mitochondrial involvement. Mitochondrial Mn SUPEROXIDE DISMUTASE was  
46 required for ROS-tolerance and the effect of MV was enhanced by exogenous sugar,  
47 providing further evidence for the role of mitochondria. Mutant and hormone feeding  
48 assays revealed roles for stress hormones in organellar ROS-responses. The *radical-*  
49 *induced cell death1* mutant, which is tolerant to MV-induced ROS and exhibits altered  
50 mitochondrial signalling, was used to probe interactions between organelles. Our  
51 studies implicate mitochondria in the response to ROS induced by MV.

52

53 **Keywords:** Mitochondria, paraquat, ROS, RCD1, chloroplast, retrograde signalling, natural  
54 variation

55

## 56 Introduction

57 The study of reactive oxygen species (ROS) has transformed in the last decade, shifting our  
58 view from ROS as indiscriminate damaging agents to versatile and specific signal transduction  
59 intermediates. Plants have an enormous capacity to detoxify ROS, whose accumulation is  
60 rarely accidental, rather specific signalling events carefully orchestrated by the plant (Foyer &  
61 Noctor, 2016; Waszczak *et al.*, 2018). Due to ease of use, paraquat is a commonly used ROS  
62 generator for the study of ROS signalling. Paraquat is the common name of the herbicide  
63 methyl viologen (MV; N,-N'-dimethyl-4,-4'-bipyridinium dichloride), which acts in the  
64 production of ROS via a light dependent mechanism. In chloroplasts MV competes with  
65 ferredoxin for electrons on the acceptor side of Photosystem I (PSI; Dodge, 1989; Fuerst &  
66 Norman, 1991) and forms the MV cation radical, which reacts instantly with O<sub>2</sub> to form  
67 superoxide (O<sub>2</sub><sup>•-</sup>; Hassan, 1984). O<sub>2</sub><sup>•-</sup> subsequently forms other ROS and can cause cell death

68 (Babbs *et al.*, 1989). This widely accepted view of MV as an inducer of toxic ROS is the  
69 relevant mechanism when used at high concentrations as an herbicide in the field. However,  
70 use at low concentrations as an experimental tool should be reconsidered in light of the current  
71 understanding of ROS signalling and processing.

72

73 Known MV tolerance mechanisms involve ROS detoxification, MV transport or sequestration,  
74 and chloroplast physiology (Vaughn *et al.*, 1989; Aono *et al.*, 1995; Van Camp *et al.*, 1996;  
75 Lasat *et al.*, 1997; Váradi *et al.*, 2000; Abarca *et al.*, 2001; Murgia *et al.*, 2004; Yu *et al.*, 2004;  
76 Davletova *et al.*, 2005; Miller *et al.*, 2007; Fujita *et al.*, 2012; Xi *et al.*, 2012; Li *et al.*, 2013;  
77 Hawkes, 2014). A relationship between long life span, sucrose availability, and tolerance  
78 against MV-induced ROS was seen in *gigantea* mutants (Kurepa *et al.*, 1998a) and exogenous  
79 sucrose treatment was shown to enhance MV toxicity (Kurepa *et al.*, 1998a, Kurepa *et al.*,  
80 1998b), however the mechanism for this effect remains unknown. In *Arabidopsis* (*Arabidopsis*  
81 *thaliana*) forward genetic screens for MV tolerance mutants have yielded some insights into  
82 chloroplast ROS signalling (Chen *et al.*, 2009; Fujita *et al.*, 2012; Xi *et al.*, 2012; Fujita &  
83 Shinozaki, 2014; Luo *et al.*, 2016). RADICAL-INDUCED CELL DEATH1 (RCD1) was  
84 isolated as a ROS signalling component (Belles-Boix *et al.*, 2000; Overmyer *et al.*, 2000) and  
85 was found to alter tolerance to MV-induced ROS (Ahlfors *et al.*, 2004; Fujibe *et al.*, 2004).  
86 The RCD1 protein interacts with several transcription factors (Ahlfors *et al.*, 2004; Jaspers *et*  
87 *al.*, 2010) and functions as an integration point for multiple hormone and ROS signals (Jaspers  
88 *et al.*, 2009).

89

90 MV induces ROS production in all organisms tested, causing ROS production in mitochondria  
91 of non-photosynthetic organisms (Krall *et al.*, 1988; Minton *et al.*, 1990; Cochemé & Murphy,  
92 2008). In plants, the induction of ROS signals by MV outside the chloroplast has been  
93 documented (Bowler *et al.*, 1991) but has remained mostly uncharacterized. Many studies have  
94 used MV treatment to test general ROS responses; however, few of these directly used MV as  
95 a tool to address ROS or redox signalling and their associated pathways. Thus, we used MV as  
96 a tool under both light and dark conditions to probe the genetics of ROS responses in and  
97 outside the chloroplast. We show an important function for mitochondria in ROS signalling  
98 induced by low concentration MV-treatment in the dark.

99

## 100 **Materials and Methods**

### 101 ***Plant material and growth***

102 *Arabidopsis* (*Arabidopsis thaliana*) genetic resources were obtained from NASC  
103 ([www.arabidopsis.info](http://www.arabidopsis.info)). All mutants were PCR genotyped and confirmed over two  
104 generations. Double mutant construction has been presented elsewhere (Brosché *et al.*, 2014),  
105 primers used in genotyping mutants are listed in Table S1.

106 Aseptic cultures were performed on 135 mm square plates in the presence or absence of MV  
107 as indicated, on 0.5x MS (Murashige and Skoog) medium containing 0.8% agar, 0.05% MES  
108 (pH 5.7) and 1% sucrose, except as otherwise noted. Following a three-day stratification (4°C  
109 in the dark) seeds were light treated for 4 hr to promote germination and then placed vertically  
110 in an environmental chamber (Sanyo; [www.sanyo-biomedical.co.uk](http://www.sanyo-biomedical.co.uk)) with 12/12 hr day/night  
111 cycle, constant 20°C, and light of 120  $\mu\text{mol}$  of photons  $\text{m}^{-2} \text{s}^{-1}$ . For dark treatments, plates were  
112 covered with two layers of aluminium foil.

### 113 ***Growth and chlorophyll fluorescence assays***

114 For growth measurements, eight- or nine-day-old seedlings were photographed with a size  
115 scale then hypocotyl- or root-lengths were determined with ImageJ software  
116 (<http://rsbweb.nih.gov/ij/>). Chlorophyll fluorescence imaging was performed as described  
117 (Barbagallo *et al.*, 2003); briefly, 1-2 seeds were sown in each well (with 0.180 ml media) of  
118 a black 96-well-plate and sealed with plastic film. Seedlings were grown under standard  
119 conditions with 220  $\mu\text{mol}$  of photons  $\text{m}^{-2} \text{s}^{-1}$  for four or five days before treatments. MV was  
120 added to a final concentration of 250  $\mu\text{M}$ . All plates were placed in the dark for 20 minutes and  
121 then were placed in the light (160  $\mu\text{mol}$  of photons  $\text{m}^{-2} \text{s}^{-1}$ ) for 6-8 hr or in the dark for 20 hr  
122 before measurements. Salicylic acid, methyl jasmonate, abscisic acid, and 1-  
123 aminocyclopropane-1-carboxylic acid (ACC) (Sigma; [www.sigmaaldrich.com](http://www.sigmaaldrich.com)) were added to  
124 a final concentration of 200  $\mu\text{M}$  14 hr prior to MV for hormone protection experiments. Whole  
125 plate imaging utilized a Walz M-series imaging PAM Chlorophyll fluorescence system  
126 ([www.walz.com](http://www.walz.com)) using the maxi head. Measurement of quantum efficiency of PSII ( $F_v F_m^{-1}$ )  
127 from individual wells was then calculated with Walz Imaging Win software. Before  
128 measurements, seedlings were dark adapted for 20 minutes.

### 129 ***H<sub>2</sub>O<sub>2</sub> staining***

130 H<sub>2</sub>O<sub>2</sub> accumulation was visualized by staining with 1mg/ml 3,3'-diaminobenzidine (DAB) in  
131 10 mM NaHPO<sub>4</sub> (pH 4.0). Detached rosettes of 18-day-old soil grown Col-0 and *rcdl* plants  
132 were floated on water (ddH<sub>2</sub>O with 0.05% Tween20), or water containing 1 $\mu\text{M}$  MV, overnight  
133 (15 hrs) in the dark. Plants were then pre-treated for 0-2 hrs in the light (250  $\mu\text{moles m}^{-2} \text{sec}^{-1}$

134 <sup>1</sup>), before vacuum infiltration with DAB and stained for 5 hrs in the dark. Samples were fixed  
135 and cleared in 95% ETOH: 85% lactate: glycerol (3:1:1) for 2-10 days. Cleared samples were  
136 stored and mounted in 60% glycerol.

### 137 ***Light treatments***

138 For photoinhibition under high light, 11-day-old plate-grown seedlings were placed in the  
139 imaging PAM chlorophyll fluorescence system and subjected to intermittent high light,  
140 consisting of 60-minute illumination with strong blue light ( $200 \mu\text{mol photons m}^{-2} \text{s}^{-1}$ ), 25  
141 minutes of darkness, then  $F_0$  and  $F_m$  were registered, after which the next cycle began. To avoid  
142 overheating, continuous cooling to room temperature was used by running tap water through  
143 coiled rubber tubing beneath. Photoinhibition was observed as decreased  $F_v F_m^{-1} = (F_m - F_0)$   
144  $F_m^{-1}$ . For fluctuating light treatments, plants were grown on soil with an alternating 5 min low  
145 light ( $50 \mu\text{mol photons m}^{-2} \text{s}^{-1}$ ) and 1 min high light ( $500 \mu\text{mol photons m}^{-2} \text{s}^{-1}$ ) illumination  
146 (Tikkanen *et al.*, 2010) throughout the entire 8 hr light period of an 8/16 h light/dark cycle).

### 147 ***Chlorophyll measurements***

148 Leaf disks (7 mm) from the first two fully expanded middle-aged leaves were infiltrated with  
149 0.5x MS liquid with MV and placed on similar MV containing solid media plates for 14 hr  
150 under light or dark condition before photographing. Pigments were extracted in 80% acetone  
151 and absorbance measured at 645 and 663 nm using a spectrophotometer (Agilent 8453;  
152 [www.home.agilent.com](http://www.home.agilent.com)). The total chlorophyll concentration was calculated using Arnon's  
153 equation (Arnon, 1949).

### 154 ***QTL mapping***

155 The mapping population of 125 Kondara x *Ler* recombinant inbred lines (RILs) was treated  
156 with or without  $0.1 \mu\text{M}$  MV for growth assays or  $250 \mu\text{M}$  MV for the fluorescence assay. For  
157 mapping the QTL in light/dark, the ratio of each line was obtained by using the mean of the  
158 root (in light) or hypocotyl (in dark) lengths of treated plants divided by control. For  
159 fluorescence assays, the  $F_v F_m^{-1}$  of the controls were all the same, thus  $F_v F_m^{-1}$  values after MV  
160 treatment were used directly for QTL mapping. Data normality was checked with quantile-  
161 quantile plots in R (R Development Core Team, 2014). Data for dark-grown seedlings was  
162 normally distributed but light grown was  $\log_{10}$  transformed to gain normality. QTL mapping  
163 was performed with single-locus QTL scans with interval mapping. Chlorophyll fluorescence  
164 data could not be transformed to gain normality and therefore nonparametric interval mapping  
165 was conducted. The genome-wide LOD threshold for a QTL significance ( $P < 0.05$ ) was

166 calculated separately for each trait by 10,000 permutations. All the QTL analyses used R with  
167 R/qtl (Broman *et al.*, 2003).

### 168 **qPCR**

169 Five-day-old *in vitro* grown seedlings were transferred to medium with or without 0.1  $\mu$ M MV  
170 and collected two days later in liquid nitrogen for RNA extraction. Four-week-old soil grown  
171 plants were collected for RNA extraction (GeneJET Plant RNA Purification Mini Kit, Thermo  
172 Scientific). Reverse transcription was performed with 3  $\mu$ g DNaseI treated RNA using  
173 RevertAid Premium Reverse Transcriptase (Thermo Scientific). The cDNA was diluted to 100  
174  $\mu$ l final volume. Three technical repeats with 1  $\mu$ l cDNA and 5x HOT FIREPol EvaGreen  
175 qPCR Mix (Solis Biodyne) were used for qRT-PCR. Primer sequences and amplification  
176 efficiencies determined with the Bio-Rad CFX Manager program from a cDNA dilution series  
177 are given in Table S1. The raw cycle threshold values were analysed in Qbase+  
178 (<https://www.qbaseplus.com/>; Hellemans *et al.* 2007) using *YLS8* (AT5G08290), *TIP41*  
179 (AT4G34270) and *PP2AA3* (AT1G13320) as the reference genes as described (Brosché *et al.*,  
180 2014).

### 181 **Statistics**

182 The statistical significance of the relative change in hypocotyl and root lengths was estimated  
183 using scripts in R. First, a logarithm of the raw hypocotyls length data was taken and a linear  
184 model was fitted with genotype, treatment, and their interaction terms. Model contrasts and  
185 their significances were estimated with multcomp package in R (Version 3.03; Bretz *et al.*,  
186 2010). All experiments were repeated at least three times.

### 187 **Protein extraction and immunoblotting**

188 Total proteins were extracted by grinding of frozen seedlings in RIPA buffer (50 mM Tris-  
189 HCl, pH 8.0, 150 mM NaCl, 1% Triton X-100, 0.5% sodium deoxycholate, 0.1% SDS) in the  
190 presence of protease inhibitor cocktail (Sigma-Aldrich; [www.sigmaaldrich.com](http://www.sigmaaldrich.com)). The samples  
191 were centrifuged at 16,000 x g for 15 min and the supernatant used for western blotting. Protein  
192 concentration in the extracts was determined by Lowry method using the DC protein assay  
193 (BioRad; <http://www.bio-rad.com>).

194 Proteins (5 to 10  $\mu$ g per lane) were separated using 15% SDS-PAGE gels in presence of 6 M  
195 urea and transferred onto PVDF membranes (BioRad). The membranes were blocked in 3%  
196 BSA in TBS-T (20 mM Tris-HCl, pH 7.5, 150 mM NaCl, 0.05% Tween-20) buffer and probed  
197 with an ASCOBATE PEROXIDASE (APX)-specific antibody diluted 1:2000 with TBS-T

198 buffer containing 1% BSA. Horseradish peroxidase-conjugated donkey anti-rabbit IgG (GE  
199 Healthcare; [www.gehealthcare.fi](http://www.gehealthcare.fi)) was used as a secondary antibody and the signal was  
200 visualized by SuperSignal West Pico luminescence reagents (ThermoFisher Scientific;  
201 [www.fishersci.fi](http://www.fishersci.fi)).

### 202 *Abundance of photosynthetic complexes by 1-dimensional acrylamide gels*

203 Fourteen-day-old seedlings from plates +/- MV (0.4  $\mu$ M) were snap-frozen in liquid nitrogen  
204 and ground with glass beads in Precellys 24 tissue homogenizer (3 x 10 seconds at 6800 rpm).  
205 Total protein was extracted by incubation of the homogenate in 100 mM Tris (pH 7.8), 2%  
206 SDS, 1  $\times$  Protease Inhibitor Cocktail for 30 minutes at 37  $^{\circ}$ C. Protein samples were loaded on  
207 equal chlorophyll basis (0.45  $\mu$ g of chlorophyll per well) and separated in 12 % acrylamide  
208 gels. Immunoblotting was performed with the antibodies raised against PSI subunit PsaB, PSII  
209 subunit PsbD, or LhcA2 and LhcB2 antennae proteins (Agrisera; [www.agrisera.com](http://www.agrisera.com)).

210

## 211 **Results**

### 212 *The dark response to MV.*

213 This study utilizes the MV tolerant *rcd1* mutant and its moderately tolerant Col-0 parental  
214 accession. Decreased expression or activity of MV transporters excludes MV from its active  
215 sites leading to stress avoidance (reviewed in Fujita & Shinozaki, 2014). To address this in the  
216 *rcd1* mutant, the expression of known MV transporters was tested. Only minor differences in  
217 expression between *rcd1* and Col-0 were observed and accumulation of the major plasma  
218 membrane importer, *PDR11*, was higher in *rcd1* (Fig. S1). These data suggest that *rcd1* did not  
219 avoid stress due to altered MV transport. Further, the effect of MV on PSI oxidation and initial  
220 H<sub>2</sub>O<sub>2</sub> production was similar in Col-0 and *rcd1* (Shapiguzov *et al.*, 2018). Together this  
221 indicates that *rcd1* tolerance is not based on restricted access of MV to PSI. Thus, we use the  
222 *rcd1* mutant here as a tool to dissect MV-induced ROS signalling. Plant MV responses are  
223 dependent on light, growth, and assay conditions, which prompted us to evaluate these  
224 parameters. The response to MV-induced ROS was assayed *in vitro* on MS plates under  
225 standard light conditions (100  $\mu$ moles m<sup>-2</sup> s<sup>-1</sup>) scored by visual appearance (Fig. 1). Root length  
226 was quantified in light-grown seedlings (Fig. 1b). Growth inhibition assays of four independent  
227 *rcd1* alleles (Jaspers *et al.*, 2009) indicated all were equally tolerant (Fig. S2a). The *rcd1-1*  
228 allele was used in further experiments, hereafter referred to as *rcd1*. Three-week-old soil grown  
229 plants were assayed for leaf disk chlorophyll bleaching (Fig. 2) and in seven-day-old *in vitro*  
230 grown seedlings decreases in quantum efficiency of photosystem II (PSII) ( $F_v F_m^{-1}$ ) was

231 monitored as a stress index (Barbagallo *et al.*, 2003) using chlorophyll fluorescence (Fig. 2c).  
232 All assays detected differential tolerance to MV-induced ROS over a wide but variable range  
233 of concentrations. Root length (Fig. 1a,b) was the most sensitive assay detecting differences in  
234 the low nM range. The root length assay exhibited light intensity dependent effects of MV (not  
235 shown) and has been previously shown to correlate well with other light based assays, such as  
236 photosynthesis rate, leaf growth, and leaf chlorophyll bleaching (Davletova *et al.*, 2005; De  
237 Clercq *et al.*, 2013), thus was used here in subsequent studies of MV-induced ROS responses  
238 in the light.

239

240 To explore a potential role for non-photosynthetic processes in MV-induced ROS signalling,  
241 we assessed MV-induced ROS sensitivity in darkness, when photosynthetic electron transfer  
242 is inactive. Hypocotyl length was used as an index of MV-induced growth inhibition under  
243 dark conditions. MV inhibited hypocotyl elongation in both Col-0 and *rcd1* seedlings in the  
244 dark and the tolerance of *rcd1* was also observed here (Figs. 1a, c, S2b). In the dark, MV-  
245 induced changes were only detectable in growth-based assays. Chloroplast damage based  
246 assays exhibited no change by MV treatment in dark conditions (Fig. 2a-c).

247

248 To detect potential ROS sourced outside the chloroplast, we monitored MV-induced H<sub>2</sub>O<sub>2</sub>  
249 accumulation by DAB staining in the dark. Detached whole rosettes were loaded with 1 μM  
250 MV overnight in darkness, exposed to a two-hour light pulse, then transferred back to darkness  
251 for infiltration and staining with DAB for 5 hrs. In this experimental design, DAB is never  
252 present in the light. Col-0 plants exhibited marked accumulation of DAB precipitate (Fig. 3);  
253 importantly, this revealed accumulation of H<sub>2</sub>O<sub>2</sub> in the darkness, when the chloroplast electron  
254 transfer chain is inactive. MV-tolerant *rcd1* mutant plants exhibited little change over the  
255 background stain intensity. This response in Col-0 plants was triggered by the light pre-  
256 treatment (Fig. S3). This indicated that MV-induced responses were initiated in chloroplasts,  
257 but the subsequent ROS production did not require active chloroplast electron transport.

258

259 This was further addressed using genotypes or conditions known to enhance mitochondrial  
260 ROS accumulation. First, *AtMSD1* RNAi plants lacking the mitochondrial MnSOD, and thus  
261 deregulated mitochondrial ROS accumulation (Morgan *et al.*, 2008), were assayed. Under both  
262 light and dark conditions, *AtMSD1* RNAi plants exhibited enhanced growth inhibition by MV-  
263 induced ROS (Fig. 3b). Second, exogenous sugar increases oxidative phosphorylation and  
264 mitochondrial electron transfer (Fernie *et al.*, 2004; Keunen *et al.*, 2013), which could enhance



265 ROS production by MV. Accordingly, such treatment was shown to enhance MV responses  
266 (Kurepa *et al.*, 1998b). To test this under conditions that control for any possible osmotic or  
267 sugar signalling effects, we used an experimental design that compensated for these effects by  
268 expressing the results as a ratio where plants treated with MV and sugar are normalized to  
269 respective control plates containing the same sugar concentration, but no MV. Exogenous sugar  
270 enhanced the inhibition of growth by MV both in the light and dark (Fig. 3c,d) suggesting that  
271 mitochondria are involved in MV action also under light. This effect was similar for sucrose  
272 (Fig. 3c,d) and glucose (Figs. S4, S5). Taking these results into account, additional MV dose  
273 response curves under different sugar concentrations (Figs. 3, S5), were used for selecting  
274 experimental conditions; unless otherwise indicated, 0.1 - 0.2  $\mu$ M MV and 1% sucrose were  
275 used for all further experiments presented below.

276

### 277 ***MV-induced mitochondrial signals***

278 Additional support for the involvement of signals originating from mitochondria in MV  
279 responses was obtained from gene expression meta-analysis with data from Genevestigator  
280 (Hruz *et al.*, 2008). The expression of MV responsive genes was plotted in response to MV,  
281 inhibitors of mitochondrial function, and light treatments. This gene set was stringently defined  
282 and was previously found to be expressed in both photosynthetic and non-photosynthetic  
283 tissues, i.e. leaves and roots, treated with MV (Hahn *et al.*, 2013). Transcript abundance of  
284 these genes was higher in response to both MV and mitochondrial inhibitors, but lower in  
285 response to high light (Fig. 3e, Table S2a).

286

287 Analysis of genes deregulated in the MV-tolerant *rcd1* mutant provides further evidence of  
288 mitochondrial involvement. RCD1 is known to interact with transcription factors that control  
289 expression of mitochondrial dysfunction stimulon (MDS) genes (Jaspers *et al.*, 2009; Van  
290 Aken *et al.*, 2009; De Clercq *et al.*, 2013; Shapiguzov *et al.*, 2018). MDS genes are nuclear  
291 encoded genes for mitochondria localized proteins that are transcriptionally activated via  
292 mitochondrial retrograde regulation (MRR) upon the disturbance of mitochondrial function by  
293 stress. A clear overlap and statistically significant enrichment is seen when genes deregulated  
294 in *rcd1* are compared with MDS genes (Fig. 3f, Table S2b; Cluster IIIb in Brosché *et al.*, 2014).  
295 Together, these findings support that RCD1 regulates mitochondrial processes.

296

### 297 ***Chloroplast-mitochondrial interactions in MV response.***

298 Loss of RCD1 function results in marked alterations in mitochondrial functions (Shapiguzov  
299 *et al.*, 2018). However, the question remains unresolved to which extent mitochondria  
300 contribute to chloroplast-related phenotypes of *rcd1* including tolerance to MV-induced ROS.  
301 To address this, we quantitatively tested the *rcd1* mutant for tolerance to chloroplast stress  
302 induced by high light (Fig. 4). Plant stress levels were monitored by measuring  $F_v F_m^{-1}$  between  
303 pulses of high light ( $1200 \mu\text{mol}$  of photons  $\text{m}^{-2} \text{s}^{-1}$ ) over a 12 hr time course. The *rcd1* mutant  
304 reproducibly exhibited only slightly lower PSII photoinhibition levels throughout the entire 12  
305 hr experiment (Fig. 4a), thus *rcd1* exhibits only a low level of tolerance to high light. To further  
306 test this we utilized the genes that are deregulated in *rcd1*, which we previously identified  
307 (Jaspers *et al.*, 2009) and queried against databases of experimentally determined chloroplast  
308 and mitochondria resident proteins using fisher's exact test to discern enrichment for proteins  
309 localized to these organelles. Target genes downstream of RCD1 exhibited a significant  
310 enrichment ( $p=0.0008544$ ) for genes encoding mitochondria localized proteins, but no  
311 enrichment ( $p=0.08316$ ) for genes encoding chloroplast proteins. These results further support  
312 that RCD1 regulates primarily mitochondrial processes. Thus, we concluded that the reasons  
313 for physiological abnormalities observed in *rcd1* are of predominantly mitochondrial origin.

314 Given the known coordination between the mitochondria and chloroplasts in metabolism and  
315 energy production (Noguchi & Yoshida, 2008; Vanlerberghe *et al.*, 2016), we next used the  
316 *rcd1* mutant to probe the interaction of mitochondrial and chloroplastic ROS processing  
317 systems. For this, the abundance and configuration of photosynthetic machinery was tested in  
318 Col-0 and *rcd1* under severe light stress conditions. Plants were grown under fluctuating light  
319 (constant alternation between 5 min low light and 1 min high light illumination during the  
320 entire day period; Tikkanen *et al.*, 2010). Thylakoid membrane protein complexes were  
321 isolated and separated on 2D gels utilizing a blue native gel in the first dimension and SDS  
322 PAGE in the second. This revealed increased abundance of PSI supercomplexes in *rcd1* under  
323 fluctuating light (Fig. S6a,b), suggesting the effect of RCD1 and possibly mitochondria on  
324 regulation of PSII to PSI stoichiometry in the chloroplasts. In particular, maintenance of PSI  
325 was affected. PSI is the primary target of MV under light, thus regulation of its abundance was  
326 tested under MV stress conditions. Col-0 seedlings germinated and grown in the presence of  
327 MV contained less chlorophyll than *rcd1* (Fig. 2a,b). To compensate for this, protein extracts  
328 from MV-treated Col-0 and *rcd1* were loaded on the gel on equal chlorophyll basis (Fig. 4b),  
329 Col-0 seedlings displayed dramatically decreased PSI levels (judged by abundance of the core  
330 protein, PsaB) vs. PSII (PsbD) or light-harvesting antenna (LhcA2 and LhcB2). This MV-

331 dependent decrease in PSI was absent from the *rcd1* mutant (Fig. 4b). Thus, the stoichiometry  
332 of photosynthetic complexes was affected by development in the presence of MV in the wild  
333 type, but not in *rcd1*. Together, these findings suggested that adjustments of the photosynthetic  
334 apparatus under light stress was dependent on RCD1 function.

335

### 336 *Cytosolic APX in MV-triggered ROS responses*

337 Fujibe *et al.* (2004) reported higher chloroplast stromal APX (sAPX) and chloroplast thylakoid  
338 APX (tAPX) transcript accumulation in the *rcd1* mutant, suggesting its tolerance to MV-  
339 induced ROS was due to enhanced ROS detoxification. Further, it has been proposed that APXs  
340 have a significant role in regulating tolerance to MV-induced chloroplast ROS (Davletova *et*  
341 *al.*, 2005). We utilized mutants with APX function compromised in specific compartments; the  
342 cytosolic cAPX1 and two in the chloroplast, sAPX and tAPX. Mutants were confirmed by  
343 protein immunoblot to be protein null (Fig. S7a,b), including a new allele of the *capx1* mutant  
344 in the Col-0 genetic background (SAIL\_1253\_G09), here designated as *capx1-2*. The *capx1-2*  
345 mutant exhibited enhanced growth inhibition by MV-induced ROS both in the light and dark,  
346 while the *sapx*, *tapx* single- and *sapx tapx* double mutants behaved as wild type under all  
347 conditions (Fig. S7c). The reduced growth observed in soil-grown *capx1-1* (Ws-0) under  
348 normal growth conditions (Davletova *et al.*, 2005), was not observed in *capx1-2* in Col-0  
349 background (Fig. S7d). No differences in the protein levels of cAPX, tAPX or sAPX were  
350 observed in the *rcd1* mutant (Fig. S7a). These results implicate cAPX, but suggested that MV-  
351 induced ROS tolerance of RCD1 can not be explained by the accumulation of chloroplast-  
352 localized APXs, prompting further genetic experiments to explore other mechanisms.

353

### 354 *Natural variation of MV response*

355 Our data implicating mitochondria in the MV-induced ROS response relies entirely on a single  
356 accession of *Arabidopsis* (Col-0). To seek additional evidence, natural variation in the  
357 organellar ROS sensitivity of 93 diverse accessions (Nordborg *et al.*, 2005) of *Arabidopsis* was  
358 surveyed. This was first performed in the light using three different assays. A plate germination  
359 screen with 0.5 and 1.0  $\mu$ M MV was visually scored based on growth using a scale of 1-4 (Fig.  
360 S8a). Root growth and PSII quantum efficiency were used as quantitative assays (Fig. S8b,c).  
361 The *rcd1* mutant was included here as a tolerant control for reference. Mean root lengths of  
362 accessions grown on MV plates varied from 1.4 to 8.7 mm (Fig. S8b), indicating a wide  
363 variation in the MV response of *Arabidopsis*. Similarly, diverse responses were observed using

364 the chlorophyll fluorescence assay;  $F_v F_m^{-1}$  values varied from 0.109 in the sensitive Ag-0  
365 ecotype to 0.694 in the tolerant Bil-7 (Fig. S8c). With few exceptions, the relative response to  
366 MV-induced ROS of these accessions under illuminated conditions was reproducible in all the  
367 assays above.

368

369 A set of accessions representing varied responses to organellar ROS were selected for further  
370 study (Fig. 5), including the relatively sensitive Kz-1, Col-0, Ga-0, and HR-10, the moderate  
371 Kondara, Ler, Zdr-1, Ws-2, Cvi-0, and LI-0, and the relatively tolerant Mr-0, Lov-1, Bil-7 and  
372 the *rcd1* mutant. APX protein levels could not explain the observed natural variation in ROS  
373 sensitivity (Fig. S9). To test for differences, these accessions were assayed under both light and  
374 dark conditions (Fig. 5a,b). About half of these had similar sensitivity in both light and dark,  
375 while six genotypes changed in their relative sensitivity; Col-0, Cvi-0 and Kondara had  
376 increased tolerance in the dark while Mr-0, Ler and Ws-2 had greater sensitivity (Fig. 5a,b ; in  
377 both panels the accessions are ordered according to tolerance under light). This demonstrates  
378 large natural variation in organellar ROS sensitivity also under dark conditions and suggests  
379 responses are conditioned by distinct loci in light and dark.

380

381 An RIL population for the cross of *Ler* and Kondara (El-Lithy *et al.*, 2006), whose relative  
382 MV-sensitivity changed between light and dark (Fig. 5a,b), was selected for in depth analysis  
383 in light and dark using QTL mapping with three different assays; chlorophyll fluorescence and  
384 root growth in the light and hypocotyl growth in the dark. In the chlorophyll fluorescence assay  
385 ( $F_v F_m^{-1}$ ), one QTL was identified on the lower arm of chromosome two (Fig. 5c, dotted lines)  
386 and in the root growth assay in the light two additional QTLs were identified; one on the upper  
387 arm of chromosome three and one on the upper arm of chromosome five (Fig. 5c, dashed lines).  
388 Dark conditions revealed two additional distinct QTLs on the bottom of chromosome four and  
389 the lower arm of chromosome five (Fig. 5c, solid lines). All QTLs identified here were distinct  
390 from previously known MV-response QTLs (in red in Fig. 5c; gene list with AGI codes listed  
391 in Table S3; Fujita *et al.*, 2012). Taken together, these data suggest multiple mechanisms  
392 underpin the observed natural variation in organellar ROS tolerance, with distinct genetic loci  
393 regulating the responses in the light and dark.

394

395 ***Stress hormones***

396 To address the role of hormone signalling, a collection of 10 stress-hormone and ROS-  
397 signalling mutants were tested using growth assays under light and dark conditions. For a list  
398 of genotypes tested, mutant names, and AGI codes, see Table S4. The results (Fig. 6) are  
399 displayed in groups of functionally related mutants involved in salicylic acid (SA), jasmonic  
400 acid (JA), ethylene (ET), and ROS scavenging (Fig. 6a) and ABA (Fig. 6c). The organellar  
401 ROS sensitivity of the *vitamin c2-1* (*vtc2-1*) mutant confirmed the role of ascorbate (ASC) in  
402 the light and to a lesser extent in the dark. Plants with diminished SA accumulation (*NahG*)  
403 displayed somewhat deficient tolerance both in the light and dark (Fig. 6a) implicating SA in  
404 organellar ROS signalling. In contrast, impaired ET-signalling led to minor tolerance. While  
405 ABA deficient mutants were mostly similar to wild type, mutants with enhanced ABA  
406 responses (*eral-2*) or ABA over-accumulation (*abo5-2*) were tolerant. The SA insensitive  
407 *npr1-1*, which hyper-accumulates SA, also exhibited tolerance. This suggests that hormone  
408 signalling- or metabolic-imbances can modulate organellar ROS-induced sensitivity.

409  
410 To address hormone signalling in *rcd1* tolerance to MV-induced ROS, 10 *rcd1* double mutants  
411 (Overmyer *et al.*, 2000; Overmyer *et al.*, 2005; Blomster *et al.*, 2011; Brosché *et al.*, 2014)  
412 were assayed using higher (0.2  $\mu$ M) MV to achieve similar relative growth inhibition in Col-0  
413 and *rcd1* (Fig. 6b). The results were again organized into functionally related groups, as above.  
414 Increased tolerance was more common than sensitivity (Fig. 6b). The *rcd1 jar1-1* mutant had  
415 opposite phenotypes in the light and dark, but the *jar1-1* single mutant had a wild type  
416 phenotype. In the dark *jar1-1* partially suppressed the *rcd1* tolerance phenotype, as *rcd1 jar1-*  
417 *1* had reduced tolerance relative to the *rcd1*. In the light, *rcd1* double mutants with *eto1-1*,  
418 *coil-16*, *jar1-1* and *npr1-1* exhibited further enhancement of tolerance. Similarly, many  
419 mutations further enhanced *rcd1* tolerance in the dark, including *rcd1* double mutants with  
420 *ein2-1*, *eto1-1*, *etr1-1*, and *NahG*.

421 The experiments above indicate a role for stress hormones, which we further tested using  
422 exogenous hormone treatment of photosynthetically active seedlings in the light using the  
423 chlorophyll fluorescence assay (Fig. 7). MV treatment resulted in visible symptoms at 24 hr  
424 (Fig. 7a) and decreased  $F_v F_m^{-1}$  at six hr (Fig. 7b,c). Pre-treatment with ABA, SA or methyl  
425 jasmonate (JA), but not the ethylene precursor ACC, resulted in significant attenuation of MV  
426 damage. This could be seen both at the level of symptom development and  $F_v F_m^{-1}$  (Fig. 7).  
427 These results further support the conclusions that the stress hormones ABA, SA and JA are

428 regulators of plant MV-induced ROS tolerance. Hormone treatments were unable to induce  
429 further tolerance in the *rcd1* mutant (Fig. S10).

## 430 **Discussion**

### 431 ***Mitochondria in MV-induced ROS signalling***

432 Multiple genetic studies presented here support that MV could initiate ROS signals in the dark,  
433 when chloroplastic electron transfer is not active. MV responses in the light, when  
434 photosynthetic electron transport is active, were frequently different from those in the dark,  
435 suggesting that distinct signalling pathways control the light and dark response to MV-induced  
436 ROS. Hence, in addition to the classical light-dependent mechanism in the chloroplast, there is  
437 another ROS signalling pathway, as there is in non-photosynthetic organisms (Krall *et al.*,  
438 1988; Minton *et al.*, 1990; Cochemé & Murphy, 2008), where MV induces ROS formation in  
439 the mitochondrial electron transfer chain. The site of MV action in the plant mitochondria  
440 should be addressed in future studies. In animals and yeast, MV acts to produce ROS at  
441 complex I, on the stromal side of the inner membrane (Cochemé and Murphy, 2008). It is  
442 conceivable that MV may act in the chloroplast in the dark. Some biochemical processes in the  
443 chloroplast also function in the dark, as seen in *Chlamydomonas* (Johnson & Alric, 2013;  
444 Cheung *et al.*, 2014). Further, the reduction of MV was observed in the dark in isolated  
445 chloroplasts (Law *et al.*, 1983). However, the lack of MV-induced chloroplast stress in the dark  
446 (Fig 2) argues against this and supports the role of mitochondria in MV responses.

447

448 The potentiation of MV-induced ROS by exogenous sugar further implicates mitochondria in  
449 MV-triggered ROS signalling. Exogenous sugar enhanced MV-induced ROS responses in both  
450 light and dark suggesting that increased mitochondrial electron flow from activation of  
451 oxidative phosphorylation (Keunen *et al.*, 2013) potentiates MV-induced mitochondrial ROS.  
452 Sugars have tight connections to energy balance, redox balance, and ROS production due to  
453 their involvement in photosynthesis, oxidative phosphorylation and fatty acid beta-oxidation  
454 (Couée *et al.*, 2006; Keunen *et al.*, 2013). Furthermore, sugars are directly perceived and have  
455 dedicated signalling pathways to control and balance energy relations (Li & Sheen, 2016).  
456 These pathways are well integrated into several plant hormone signalling pathways, such as  
457 ethylene and ABA (Gazzarrini & McCourt, 2001). Thus, an alternative interpretation would be  
458 that sugars enhance ROS signalling by direct sugar-signalling pathways. We reasoned that if  
459 this were true, then the known sugar-hypersensitive hormone signalling mutants used here  
460 (*ein2-1*, *etr1-1*, *abo5-2*, and *era1-2*) should be MV sensitive, while sugar-insensitive mutants

461 (*eto1-1*, *aba1-1*, *aba2-1*, *aba3-1*, and *abi4-1*) should be MV tolerant. This was not the case.  
462 Only the *eto1-1* mutant behaved consistent with this model; all other sugar-signalling mutants  
463 exhibited WT responses or were opposite to the above predictions. This suggests that  
464 synergism of MV and exogenous sugar is independent of sugar signalling and rather supports  
465 the model where the exogenous sugar used in our experimental system activates oxidative  
466 phosphorylation and mitochondrial electron transport. Finally, lines lacking the mitochondrial  
467 MnSOD exhibited enhanced sensitivity in both light and dark, providing further evidence for  
468 mitochondria in MV-induced ROS signalling. The involvement of these mitochondrial  
469 processes in the MV-induced ROS response in the light, which was previously considered to  
470 involve only the chloroplast, suggests that chloroplast and mitochondrial ROS signalling  
471 pathways act in concert in response to MV. Furthermore, this suggests different partially  
472 overlapping MV-induced ROS signalling mechanisms in different situations; involving the  
473 mitochondria in the dark and the chloroplast and mitochondria in the light.

474

#### 475 ***ROS signalling and cytosolic ascorbate metabolism***

476 Our results demonstrate that the role for ASC is dependent on its location. Knockouts of the  
477 chloroplast localized APXs (*tapx* and *sapx*), residing near the site of chloroplast ROS  
478 production (Asada, 1999) under light conditions had normal MV-induced ROS phenotypes  
479 (Fig. S7c) and photosynthesis rates unchanged from wild type under moderate light stress  
480 ( $1000 \mu\text{mol m}^{-2} \text{s}^{-1}$  illumination; Davletova *et al.*, 2005). This seemingly counterintuitive result  
481 may be explained by the multiple effects MV has on chloroplasts. MV competes with  
482 ferredoxin for electrons at PSI, resulting in ROS production, but also diverting electrons from  
483 ferredoxin and its downstream electron acceptors. Accordingly, MV-treatment results in a  
484 decrease in the NADPH pool (Benina *et al.*, 2015), the rapid oxidation of chloroplast ASC and  
485 GSH, and the disappearance of dehydroascorbate (Law *et al.*, 1983). Thus, MV treatment  
486 results in attenuation of chloroplast protective pathways such as the water-water cycle, cyclic  
487 electron transport, and the ASC-glutathione (GSH) cycle (Law *et al.*, 1983; Hanke & Mulo,  
488 2013). Together these results suggest the existence of chloroplast protective pathways that  
489 either divert electron flow to reduce ROS production or derive reducing power for ROS  
490 detoxification from sources other than PSI. The ASC deficient *vtc2* (Fig. 6) mutant and  
491 cytosolic *capx* mutants were MV sensitive in the light and dark (*capx1-2*, Fig. S7; *capx1-1*,  
492 Davletova *et al.*, 2005), suggesting a role for cytosolic ASC. Previously, MV-treatment was  
493 shown to result in the accumulation of cytosolic  $\text{H}_2\text{O}_2$  (Schwarzländer *et al.*, 2009). Also, a

494 requirement for cytosolic APX to maintain normal photosynthesis rates under illumination of  
495  $1000 \mu\text{mol m}^{-2} \text{s}^{-1}$  was demonstrated (Davletova *et al.*, 2005). This involvement of a cytosolic  
496 ROS scavenger for chloroplast protection suggests complex inter-compartmental signalling.  
497 Indeed, the *capx1-1* mutant was previously shown to have altered transcriptional profiles for  
498 many signalling genes and redox modifications of several key signalling proteins (Davletova  
499 *et al.*, 2005). This suggests that cAPX modulates ROS in the regulation of an inter-  
500 compartmental signalling pathway involving both photosynthetic and non-photosynthetic  
501 mechanisms. Taken together, our results support a model where ROS signalling pathways from  
502 both inside and outside the chloroplast determine the plant response to MV (Fig. 8).

503

### 504 ***The role of stress hormones***

505 Our results implicated the plant stress hormones in the organellar ROS response (Fig. 6).  
506 Results with SA-deficient (*NahG*) and SA-hyper-accumulating (*npr1*) plants suggest SA  
507 modulates intercellular ROS signalling in an NPR1-independent manner. SA is a known  
508 inhibitor of mitochondrial electron transport and inducer of mitochondrial dysfunction  
509 stimulon (MDS) marker genes (Norman *et al.*, 2004; Van Aken *et al.*, 2009), consistent with  
510 the role for mitochondria proposed here. JA signalling has been implicated in chloroplast  
511 retrograde signalling (Tikkanen *et al.*, 2014), but may also act indirectly via its mutually  
512 antagonistic interaction with SA. Also, ET modulates the xanthophyll cycle to increase ROS  
513 production and photosensitivity by the suppression of non-photochemical quenching (Chen &  
514 Gallie, 2015). Accordingly, exogenous JA, ABA, and SA treatments induce tolerance to MV-  
515 induced ROS in Col-0 (Fig. 7). These hormones do not confer any additional tolerance to *rcd1*  
516 mutant plants, suggesting that hormone-signalling and RCD1-dependent ROS signalling  
517 converge into a common downstream pathway that modulates protective responses.

518

519 In root-growth assays, ET signalling single and double mutants enhanced ROS tolerance,  
520 demonstrating additive effects in long-term developmental responses over the course of days.  
521 However, treatment of Col-0 plants with exogenous the ET precursor, ACC, had no additional  
522 effect, as measured in short term experiments lasting hours using the chlorophyll fluorescence  
523 assay. This is likely due to differences in the assays used. Several of our experiments  
524 demonstrate variability in the MV-response dependent on growth conditions and the assay used  
525 (Figs. 2, 3, and 6; Fig. S2; Fig. S3). This was especially apparent in the QTL mapping (Fig. 5;  
526 Fig. S8), where different QTLs were identified depending on the assay used, illustrating that



527 different assays can detect distinct genetic pathways governing the MV-induced ROS response.  
528 Thus, caution must be exercised in comparing results between experiments using different  
529 assays.

530

### 531 ***RCD1 and retrograde signalling***

532 RCD1 acts on multiple ROS signalling pathways in distinct subcellular compartments,  
533 including stress protection pathways (Shapiguzov *et al.*, 2018). RCD1 is a plant-specific  
534 protein that interacts with a specific set of transcription factors regulating multiple stress- and  
535 developmental-pathways (Ahlfors *et al.*, 2004; Jaspers *et al.*, 2009; Vainonen *et al.*, 2012).  
536 Analysis of RCD1-regulated genes revealed many misregulated MDS genes (Jaspers *et al.*,  
537 2009; Brosché *et al.*, 2014), which are markers of mitochondrial retrograde regulation (MRR)  
538 signalling, suggesting that RCD1 is involved in the transmission of ROS signals from the  
539 mitochondria to the nucleus. High-level overexpression of mitochondrial dysfunction stimulon  
540 (MDS) genes in *rcd1* indicates that RCD1 is also involved in retrograde signalling that results  
541 in mitochondrial stress adaptation. Our results show RCD1-dependent alterations in both  
542 chloroplasts and mitochondria, suggesting coordinated responses between the two organelles  
543 (Fig. 8), accordingly the *rcd1* mutant was highly tolerant of MV-induced ROS in both the light  
544 and dark. However the question remains, from which organelle does the primary effect on MV-  
545 induced ROS responses originate? Two lines of evidence support that RCD1 is a regulator of  
546 primarily mitochondrial processes. First, there is a large difference in magnitude between the  
547 high-light and MV phenotypes in the *rcd1* mutant; the weaker phenotype is high light stress,  
548 which is a purely chloroplastic stress. Further, genes deregulated in the *rcd1* mutant showed  
549 significant enrichment for genes encoding proteins residing in the mitochondria, but not in the  
550 chloroplast. Together these findings support a model where RCD1 acts primarily through the  
551 mitochondria to modulate MV-induced ROS signalling.

552

553 The MRR regulators, NO APICAL MERISTEM/ARABIDOPSIS TRANSCRIPTION  
554 ACTIVATION FACTOR/CUP-SHAPED COTYLEDON13 (ANAC013) and ANAC017  
555 transcription factors (De Clercq *et al.*, 2013; Ng *et al.*, 2013), are among the transcription  
556 factors that interact with RCD1 (Jaspers *et al.*, 2009; Shapiguzov *et al.*, 2018). ANAC013-  
557 overexpression enhanced tolerance to MV-induced ROS (De Clercq *et al.*, 2013) when assayed  
558 for visual symptoms (leaf bleaching and chlorosis), leaf fresh weight and root growth in the  
559 light using 0.1  $\mu$ M MV, the same as in the current study. This suggests either that ANAC013  
560 directly regulates genes important for proper chloroplast function, or an indirect interaction

561 between the mitochondria and chloroplast. Similarly, this concept has been seen before, the  
562 ABI4 transcription factor is involved in both chloroplast and mitochondrial retrograde  
563 signalling (León *et al.*, 2013; Giraud *et al.*, 2009). MDS and MRR genes are positively  
564 regulated by ANAC013 and their expression is negatively regulated by RCD1; supporting  
565 RCD1 as a regulator of MRR via its negative regulation of ANAC013 function. In a related  
566 study, ROS signals from the mitochondria and chloroplast were shown to converge on the  
567 redox regulation of RCD1 (Shapiguzov *et al.*, 2018) to alter the expression of MDR genes  
568 including alternative oxidases (*AOXs*). Enhanced accumulation of these MDR genes altered  
569 chloroplastic electron flow, decreasing chloroplastic ROS and associated damage (Shapiguzov  
570 *et al.*, 2018).

571

572 Taken together our results support the role of mitochondrial processes in the MV response. We  
573 propose that interactions between the chloroplast and mitochondria, regulated by RCD1 and  
574 stress hormones, are involved in determining plant response to redox imbalance during MV  
575 treatment.

576

## 577 **Acknowledgments**

578 We thank Tuomas Puukko and Leena Grönholm for excellent technical assistance; Eva-Mari  
579 Aro for PSI and PSII subunit antibodies; Patricia Conklin (*vtc2*), Lee Sweetlove (MnSOD  
580 RNAi line) and Zhizhong Gong (*abo5*) for seeds; and Mohamed E. El-Lithy and Martin  
581 Koornneef for the Kondara x *Ler* RIL genotyping data. This work was supported by the  
582 University of Helsinki (three-year research allocations to M.B. and K.O.) and Academy of  
583 Finland Fellowships (Decisions no.135751, 140981 and 273132 to M.B., no. 251397,  
584 256073, and 283254 to K.O. and no. 263772, 218157, 259888 and 130595 to SK). KO, JS,  
585 JK, MB, and SK were supported by the Academy of Finland Center of Excellence in  
586 Molecular Biology of Primary Producers 2014-2019 (Decisions no. 307335 and 271832). FC  
587 was a member of the University of Helsinki Doctoral Program in Plant Sciences (DPPS).

588

## 589 **References**

590 **Abarca D, Roldán M, Martín M, and Sabater, B. 2001.** *Arabidopsis thaliana* ecotype Cvi  
591 shows an increased tolerance to photo-oxidative stress and contains a new chloroplastic

- 592 copper/zinc superoxide dismutase isoenzyme. *Journal of Experimental Botany* **52**: 1417–  
593 1425.
- 594 **Ahlfors R, Lång S, Overmyer K, Jaspers P, Brosché M, Tauriainen A, Kollist H,**  
595 **Tuominen H, Belles-Boix E, Piippo M et al. 2004.** Arabidopsis RADICAL-INDUCED  
596 CELL DEATH1 belongs to the WWE protein-protein interaction domain protein family and  
597 modulates abscisic acid, ethylene, and methyl jasmonate responses. *Plant Cell* **16**: 1925–  
598 1937.
- 599 **Aono, M, Saji H, Sakamoto A, Tanaka K, Kondo N, Tanaka K. 1995.** Paraquat tolerance  
600 of transgenic *Nicotiana tabacum* with enhanced activities of glutathione reductase and  
601 superoxide dismutase. *Plant and Cell Physiology* **36**: 1687–1691.
- 602 **Arnon DI. 1949.** Copper enzymes in isolated chloroplasts. Polyphenoloxidase in *Beta*  
603 *vulgaris*. *Plant Physiology* **24**: 1–15.
- 604 **Asada K. 1999.** The water-water cycle in chloroplasts: scavenging of active oxygens and  
605 dissipation of excess photons. *Annual Review of Plant Physiology and Plant Molecular*  
606 *Biology* **50**: 601–639.
- 607 **Babbs CF, Pham JA, Coolbaugh, RC. 1989.** Lethal hydroxyl radical production in  
608 paraquat-treated plants. *Plant Physiology* **90**: 1267–1270.
- 609 **Barbagallo RP, Oxborough K, Pallett KE, Baker NR. 2003.** Rapid, noninvasive screening  
610 for perturbations of metabolism and plant growth using chlorophyll fluorescence imaging.  
611 *Plant Physiology* **132**: 485–493.
- 612 **Belles-Boix E, Babiychuk E, Van Montagu M, Inzé D, Kushnir S. 2000.** CEO1, a new  
613 protein from *Arabidopsis thaliana*, protects yeast against oxidative damage. *FEBS Letters*  
614 **482**: 19–24.
- 615 **Benina M, Mendes Ribeiro D, Gechev TS, Mueller-Roeber B, Schippers JHM. 2015.** A  
616 cell type specific view on the translation of mRNAs from ROS-responsive genes upon  
617 paraquat treatment of *Arabidopsis thaliana* leaves. *Plant Cell and Environment* **38**: 349–363.
- 618 **Bowler C, Slooten L, Vandenbranden S, De Rycke R, Botterman J, Sybesma C, Van**  
619 **Montagu M, Inzé D. 1991.** Manganese superoxide dismutase can reduce cellular damage  
620 mediated by oxygen radicals in transgenic plants. *EMBO Journal* **10**: 1723–1732.

- 621 **Bretz F, Hothorn T, Westfall P. 2010.** Multiple comparisons using R. Boca Raton, FL:  
622 CRC Press.
- 623 **Blomster T, Salojärvi J, Sipari N, Brosché M, Ahlfors R, Keinänen M, Overmyer K,**  
624 **Kangasjärvi J. 2011.** Apoplastic reactive oxygen species transiently decrease auxin  
625 signaling and cause stress-induced morphogenic response in *Arabidopsis*. *Plant Physiology*  
626 **157:** 1866-1883
- 627 **Broman KW, Wu H, Sen S, Churchill GA. 2003.** R/qtl: QTL mapping in experimental  
628 crosses. *Bioinformatics* **19:** 889–890.
- 629 **Brosché M, Blomster T, Salojärvi J, Cui F, Sipari N, Leppälä J, Lamminmäki A, Tomai**  
630 **G, Narayanasamy S, Reddy RA et al. 2014.** Transcriptomics and functional genomics of  
631 ROS-induced cell death regulation by RADICAL-INDUCED CELL DEATH1. *PLoS*  
632 *Genetics*. doi: 10.1371/journal.pgen.1004112.
- 633 **Chen R, Sun S, Wang C, Li Y, Liang Y, An F, Li C, Dong H, Yang X, Zhang J et al.**  
634 **2009.** The *Arabidopsis* PARAQUAT RESISTANT2 gene encodes an S-nitrosoglutathione  
635 reductase that is a key regulator of cell death. *Cell Research* **19:** 1377–1387.
- 636 **Chen Z, Gallie DR. 2015.** Ethylene regulates energy-dependent non-photochemical  
637 quenching in *Arabidopsis* through repression of the xanthophyll cycle. *PLoS ONE*.  
638 doi.org/10.1371/journal.pone.0144209.
- 639 **Cheung CYM, Poolman MG, Fell DA, Ratcliffe RG, Sweetlove LJ. 2014.** A diel flux  
640 balance model captures interactions between light and dark metabolism during day-night  
641 cycles in C3 and crassulacean acid metabolism leaves. *Plant Physiology* **165:** 917–929.
- 642 **Cochemé HM, Murphy MP. 2008.** Complex I is the major site of mitochondrial superoxide  
643 production by paraquat. *Journal of Biological Chemistry* **283:** 1786–1798.
- 644 **Couée I, Sulmon C, Gouesbet G, El Amrani A. 2006.** Involvement of soluble sugars in  
645 reactive oxygen species balance and responses to oxidative stress in plants. *Journal of*  
646 *Experimental Botany* **57:** 449–459.
- 647 **Davletova S, Rizhsky L, Liang H, Shengqiang Z, Oliver DJ, Coutu J, Shulaev V,**  
648 **Schlauch K, Mittler R. 2005.** Cytosolic ascorbate peroxidase 1 is a central component of the  
649 reactive oxygen gene network of *Arabidopsis*. *Plant Cell* **17:** 268–281.

- 650 **De Clercq I, Vermeirssen V, Van Aken O, Vandepoele K, Murcha MW, Law SR, Inzé**  
651 **A, Ng S, Ivanova A, Rombaut D et al. 2013.** The membrane-bound NAC transcription  
652 factor ANAC013 functions in mitochondrial retrograde regulation of the oxidative stress  
653 response in Arabidopsis. *Plant Cell* **25**: 3472–3490.
- 654 **Dodge AD. 1989.** Herbicides interacting with photosystem I. In: Dodge A.D., ed. *Herbicides*  
655 *and plant metabolism, Society for Experimental Biology seminar series*. Cambridge, UK,  
656 Cambridge University Press, 1-277.
- 657 **El-Lithy ME, Bentsink L, Hanhart CJ, Ruys GJ, Rovito D, Broekhof JLM, van der Poel**  
658 **HJA, van Eijk MJT, Vreugdenhil D, Koornneef M. 2006.** New Arabidopsis recombinant  
659 inbred line populations genotyped using SNPWave and their use for mapping flowering-time  
660 quantitative trait loci. *Genetics* **172**: 1867–1876.
- 661 **Fernie AR, Carrari F, Sweetlove LJ. 2004.** Respiratory metabolism: glycolysis, the TCA  
662 cycle and mitochondrial electron transport. *Current Opinion Plant Biology* **7**: 254–261.
- 663 **Foyer CH, Noctor G. 2011.** Ascorbate and glutathione: the heart of the redox hub. *Plant*  
664 *Physiology* **155**: 2–18.
- 665 **Foyer CH, Noctor G. 2016.** Stress-triggered redox signalling: what’s in pROSPect? *Plant*  
666 *Cell and Environment* **39**: 951–964.
- 667 **Fuerst EP, Norman MA. 1991.** Interactions of herbicides with photosynthetic electron  
668 transport. *Weed Science* **39**: 458–464.
- 669 **Fujibe T, Saji H, Arakawa K, Yabe N, Takeuchi Y, Yamamoto KT. 2004.** A methyl  
670 viologen-resistant mutant of Arabidopsis, which is allelic to ozone-sensitive *rcd1*, is tolerant  
671 to supplemental ultraviolet-B irradiation. *Plant Physiology* **134**: 275–285.
- 672 **Fujita M, Fujita Y, Iuchi S, Yamada K, Kobayashi Y, Urano K, Kobayashi M,**  
673 **Yamaguchi-Shinozaki K, Shinozaki K. 2012.** Natural variation in a polyamine transporter  
674 determines paraquat tolerance in Arabidopsis. *Proceedings of the National Academy of*  
675 *Sciences of the United States of America* **109**: 6343–6347.
- 676 **Fujita M, Shinozaki K. 2014.** Identification of polyamine transporters in plants: paraquat  
677 transport provides crucial clues. *Plant and Cell Physiology* **55**: 855–861.

- 678 **Gazzarrini S, McCourt P. 2001.** Genetic interactions between ABA, ethylene and sugar  
679 signaling pathways. *Current Opinion in Plant Biology* **4**: 387–391.
- 680 **Giraud E, Van Aken O, Ho LHM, Whelan J. 2009.** The transcription factor ABI4 is a  
681 regulator of mitochondrial retrograde expression of ALTERNATIVE OXIDASE1a. *Plant*  
682 *Physiology* **150**: 1286–1296.
- 683 **Hahn A , Kilian J, Mohrholtz A, Ladwig F, Peschke F, Dautel R, Harter K, Berendzen**  
684 **KW, Wanke D. 2013.** Plant core environmental stress response genes are systemically  
685 coordinated during abiotic stresses. *International Journal of Molecular Sciences* **14**: 7617–  
686 7641.
- 687 **Hanke G, Mulo P. 2013.** Plant type ferredoxins and ferredoxin-dependent metabolism.  
688 *Plant, Cell & Environment* **36**: 1071–1084.
- 689 **Hassan HM. 1984.** Exacerbation of superoxide radical formation by Paraquat. *Methods in*  
690 *Enzymology* **105**: 523–532.
- 691 **Hawkes TR. 2014.** Mechanisms of resistance to paraquat in plants. *Pest Management*  
692 *Science* **70**: 1316–1323.
- 693 **Hruz T, Laule O, Szabo G, Wessendorp F, Bleuler S, Oertle, L, Widmayer P, Gruissem**  
694 **W, Zimmermann P. 2008.** Genevestigator v3: a reference expression database for the meta-  
695 analysis of transcriptomes. *Advances in Bioinformatics*. doi: 10.1155/2008/420747.
- 696 **Jaspers P, Blomster T, Brosché M, Salojärvi J, Ahlfors R, Vainonen JP, Reddy RA,**  
697 **Immink R, Angenent G, Turck F et al. 2009.** Unequally redundant RCD1 and SRO1  
698 mediate stress and developmental responses and interact with transcription factors. *Plant*  
699 *Journal* **60**: 268–279.
- 700 **Jaspers P, Overmyer K, Wrzaczek M, Vainonen JP, Blomster T, Salojärvi J, Reddy RA,**  
701 **Kangasjärvi J. 2010.** The RST and PARP-like domain containing SRO protein family:  
702 analysis of protein structure, function and conservation in land plants. *BMC Genomics*. doi:  
703 10.1186/1471-2164-11-170.
- 704 **Johnson X, Alric J. 2013.** Central carbon metabolism and electron transport in  
705 *Chlamydomonas reinhardtii*: metabolic constraints for carbon partitioning between oil and  
706 starch. *Eukaryotic Cell* **12**: 776–793.

- 707 **Schwarzländer M, Fricker MD, Sweetlove LJ. 2009.** Monitoring the *in vivo* redox state of  
708 plant mitochondria: Effect of respiratory inhibitors, abiotic stress and assessment of recovery  
709 from oxidative challenge. *Biochimica et Biophysica Acta* **1787**: 468–475.
- 710 **Keunen E, Peshev D, Vangronsveld J, Van Den Ende W, Cuypers A. 2013.** Plant sugars  
711 are crucial players in the oxidative challenge during abiotic stress: extending the traditional  
712 concept. *Plant Cell and Environment* **36**: 1242–1255.
- 713 **Krall J, Bagley AC, Mullenbach GT, Hallewell RA, Lynch RE. 1988.** Superoxide  
714 mediates the toxicity of paraquat for cultured mammalian cells. *Journal of Biological*  
715 *Chemistry* **263**: 1910–1914.
- 716 **Kurepa J, Smalle J, Van Montagu M, Inzé D. 1998a.** Oxidative stress tolerance and  
717 longevity in Arabidopsis: the late-flowering mutant *gigantea* is tolerant to paraquat. *Plant*  
718 *Journal* **14**: 759–764.
- 719 **Kurepa J, Smalle J, Van Montagu M, Inzé D. 1998b.** Effects of sucrose supply on growth  
720 and paraquat tolerance of the late-flowering *gi-3* mutant. *Plant Growth Regulation* **26**: 91–  
721 96.
- 722 **Lasat MM, DiTomaso JM, Hart JJ, Kochian LV. 1997.** Evidence for vacuolar  
723 sequestration of paraquat in roots of a paraquat-resistant *Hordeum glaucum* biotype.  
724 *Physiologia Plantarum* **99**: 255–262.
- 725 **Law MY, Charles SA, Halliwell B. 1983.** Glutathione and ascorbic acid in spinach  
726 (*Spinacia oleracea*) chloroplasts. *Biochemical Journal* **210**: 899–903.
- 727 **León P, Gregorio J, Cordoba E. 2013.** ABI4 and its role in chloroplast retrograde  
728 communication. *Frontiers in Plant Science*. doi: 10.3389/fpls.2012.00304.
- 729 **Li J, Mu J, Bai J, Fu F, Zou T, An F, Zhang J, Jing H, Wang Q, Li Z et al. 2013.**  
730 Paraquat resistant1, a golgi-localized putative transporter protein, is involved in intracellular  
731 transport of paraquat. *Plant Physiology* **162**: 470–483.
- 732 **Li L, Sheen J. 2016.** Dynamic and diverse sugar signaling. *Current Opinion in Plant Biology*  
733 **33**: 116–125.
- 734 **Luo C, Cai X-T, Du J, Zhao T-L, Wang P-F, Zhao P-X, Liu R, Xie Q, Cao X-F, Xiang**  
735 **C-B 2016.** PARAQUAT TOLERANCE3 is an E3 ligase that switches off activated oxidative

- 736 response by targeting histone-modifying PROTEIN METHYLTRANSFERASE4b. *PLoS*  
737 *Genetics*. doi.org/10.1371/journal.pgen.1006332.
- 738 **Miller G, Suzuki N, Rizhsky L, Hegie A, Koussevitzky S, Mittler R. 2007.** Double  
739 mutants deficient in cytosolic and thylakoid ascorbate peroxidase reveal a complex mode of  
740 interaction between reactive oxygen species, plant development, and response to abiotic  
741 stresses. *Plant Physiology* **144**: 1777–1785.
- 742 **Minton KW, Tabor H, Tabor CW. 1990.** Paraquat toxicity is increased in *Escherichia coli*  
743 defective in the synthesis of polyamines. *Proceedings of the National Academy of Sciences of*  
744 *the United States of America* **87**: 2851–2855.
- 745 **Morgan MJ, Lehmann M, Schwarzländer M, Baxter CJ, Sienkiewicz-Porzucek A,**  
746 **Williams TCR, Schauer N, Fernie AR, Fricker MD, Ratcliffe RG et al. 2008.** Decrease in  
747 manganese superoxide dismutase leads to reduced root growth and affects tricarboxylic acid  
748 cycle flux and mitochondrial redox homeostasis. *Plant Physiology* **147**: 101–114.
- 749 **Murgia I, Tarantino D, Vannini C, Bracale M, Carravieri S, Soave C. 2004.** *Arabidopsis*  
750 *thaliana* plants overexpressing thylakoidal ascorbate peroxidase show increased resistance to  
751 Paraquat-induced photooxidative stress and to nitric oxide-induced cell death. *Plant Journal*  
752 **38**: 940–953.
- 753 **Ng S, Ivanov A, Duncan O, Law SR, Van Aken O, De Clercq I, Wang Y, Carrie C, Xu**  
754 **L, Kmiec B et al. 2013.** A membrane-bound NAC transcription factor, ANAC017, mediates  
755 mitochondrial retrograde signaling in *Arabidopsis*. *Plant Cell* **25**: 3450–3471.
- 756 **Noguchi K, Yoshida K. 2008.** Interaction between photosynthesis and respiration in  
757 illuminated leaves. *Mitochondrion* **8**: 87–99.
- 758 **Nordborg M, Hu TT, Ishino Y, Jhaveri J, Toomajian C, Zheng H, Bakker E, Calabrese**  
759 **P, Gladstone J, Goyal R et al. 2005.** The pattern of polymorphism in *Arabidopsis thaliana*.  
760 *PLoS Biology*. doi:10.1371/journal.pbio.0030196
- 761 **Norman C, Howell KA, Millar AH, Whelan JM, Day DA. 2004.** Salicylic acid is an  
762 uncoupler and inhibitor of mitochondrial electron transport. *Plant Physiology* **134**: 492–501.
- 763 **Overmyer K, Tuominen H, Kettunen R, Betz C, Langebartels C, Sandermann H,**  
764 **Kangasjärvi J. 2000.** Ozone-sensitive *Arabidopsis rcd1* mutant reveals opposite roles for



- 765 ethylene and jasmonate signaling pathways in regulating superoxide-dependent cell death.  
766 *Plant Cell* **12**: 1849–1862.
- 767 **Overmyer K, Brosché M, Pellinen R, Kuittinen T, Tuominen H, Ahlfors R, Keinänen**  
768 **M, Saarma M, Scheel D, Kangasjärvi J. 2005.** Ozone-induced programmed cell death in  
769 the *Arabidopsis radical-induced cell death1* mutant. *Plant Physiology* **137**: 1092-1104.
- 770 **R Development Core Team. 2014.** *R: A language and environment for statistical*  
771 *computing*. [WWW document] URL <http://www.R-project.org/>. [accessed 1 May 2014]
- 772 **Shapiguzov A, Vainonen JP, Hunter K, Tossavainen H, Tiwari A, Järvi S, Hellman M,**  
773 **Wybouw B, Aarabi F, Alseekh S et al. 2018.** RCD1 coordinates chloroplastic and  
774 mitochondrial electron transfer through interaction with ANAC transcription factors.  
775 *BioRxiv*. doi.org/10.1101/327411
- 776 **Tikkanen M, Grieco M, Kangasjärvi S, Aro E-M. 2010.** Thylakoid protein  
777 phosphorylation in higher plant chloroplasts optimizes electron transfer under fluctuating  
778 light. *Plant Physiology* **152**: 723–735.
- 779 **Tikkanen M, Gollan PJ, Mekala NR, Isojärvi J, Aro E-M. 2014.** Light-harvesting mutants  
780 show differential gene expression upon shift to high light as a consequence of photosynthetic  
781 redox and reactive oxygen species metabolism. *Philosophical Transactions of the Royal*  
782 *Society London, B, Biological Sciences*. doi: 10.1098/rstb.2013.0229
- 783 **Vainonen JP, Jaspers P, Wrzaczek M, Lamminmäki A, Reddy RA, Vaahtera L,**  
784 **Brosché M, Kangasjärvi J. 2012.** RCD1–DREB2A interaction in leaf senescence and stress  
785 responses in *Arabidopsis thaliana*. *Biochemical Journal* **442**: 573–581.
- 786 **Van Aken O, Giraud E, Clifton R, Whelan J. 2009.** Alternative oxidase: a target and  
787 regulator of stress responses. *Physiologia Plantarum* **137**: 354–361.
- 788 **Van Camp W, Capiou K, Van Montagu M, Inze D, Sloaten L. 1996.** Enhancement of  
789 oxidative stress tolerance in transgenic tobacco plants overproducing Fe-superoxide  
790 dismutase in chloroplasts. *Plant Physiology* **112**: 1703–1714.
- 791 **Vanlerberghe G C, Martyn G D, Dahal K. 2016.** Alternative oxidase: a respiratory electron  
792 transport chain pathway essential for maintaining photosynthetic performance during drought  
793 stress. *Physiologia Plantarum* **157**: 322-337.

794 **Váradí G, Darkó É, Lehoczki E. 2000.** Changes in the xanthophyll cycle and fluorescence  
795 quenching indicate light-dependent early events in the action of paraquat and the mechanism  
796 of resistance to paraquat in *Erigeron canadensis* (L.) Cronq. *Plant Physiology* **123**: 1459–  
797 1470.

798 **Vaughn KC, Vaughan MA, Camilleri P. 1989.** Lack of cross-resistance of paraquat-  
799 resistant hairy fleabane (*Conyza bonariensis*) to other toxic oxygen generators indicates  
800 enzymatic protection is not the resistance mechanism. *Weed Science* **37**: 5–11.

801 **Xi J, Xu P, Xiang C-B. 2012.** Loss of AtPDR11, a plasma membrane-localized ABC  
802 transporter, confers paraquat tolerance in *Arabidopsis thaliana*. *Plant Journal*. **69**: 782–791.

803 **Yu Q, Cairns A, Powles SB. 2004.** Paraquat resistance in a population of *Lolium rigidum*.  
804 *Functional Plant Biology* **31**: 247–254.

805 **Waszczak C, Carmody M, Kangasjärvi J. 2018.** Reactive oxygen species in plant  
806 signaling. *Annual Review of Plant Biology*. doi.org/10.1146/annurev-arplant-042817-040322

807

## 808 **Supporting Information**

809 **Fig. S1** Transcript accumulation of known methyl-viologen (MV) transporter genes.

810 **Fig. S2** Organellar ROS tolerance of four *radical-induced cell death1* (*rcd1*) alleles.

811 **Fig. S3** Diaminobenzidine (DAB) staining of methyl viologen (MV)-induced H<sub>2</sub>O<sub>2</sub>  
812 accumulation in the dark.

813 **Fig. S4** Glucose enhanced the methyl-viologen (MV)-induced ROS response in light and dark.

814 **Fig. S5** Optimization of assay conditions for genetic studies.

815 **Fig. S6** Chloroplast adaptation to fluctuating light stress in Col-0 and *radical-induced cell*  
816 *death1* (*rcd1*) mutant plants.

817 **Fig. S7** Ascorbate peroxidase (APX) mutants.

818 **Fig. S8** Natural variation in the Arabidopsis methyl viologen (MV)-response.

819 **Fig. S9** Ascorbate peroxidase protein levels in Arabidopsis natural accessions under control  
820 and methyl viologen (MV) treated conditions.

821 **Fig. S10** Effect of exogenous stress hormone treatment on methyl viologen (MV) tolerance of  
822 the *radical-induced cell death1 (rcd1)* mutant.

823 **Table S1** Primers used in this study.

824 **Table S2** Information about genes used in Figure 3.

825 **Table S3** Information about genes used in Figure 5c.

826 **Table S4** Mutants used in this study.

827

## 828 **Figure Legends**

829 **Fig. 1** Methyl viologen (MV)-induced growth inhibition in light and dark. (a) Wild type (Col-  
830 0) and the *radical-induced cell death1 (rcd1)* mutant after eight or nine days of growth on  
831 0.1  $\mu$ M MV or control plates. Scale bar = 1 cm, N=12. (b) Quantification of root length in the  
832 light (c) or hypocotyl length in the dark at different MV concentrations. Results are presented  
833 as means  $\pm$ SD (N=15). Wild type Col-0 and *rcd1* were grown eight or nine days in the light or  
834 dark on plates containing MV at the indicated concentrations, they were photographed and root  
835 or hypocotyl lengths quantified using ImageJ. All experiments were repeated three times with  
836 similar results and one representative experiment is shown.

837

838 **Fig. 2** Methyl viologen (MV)-induced chloroplast damage in light and dark. (a) Leaf disks cut  
839 from three-week-old soil grown wild type (Col-0) and *radical-induced cell death1 (rcd1)*  
840 mutant plants were treated *in vitro* with different concentrations of MV in light or dark for 16  
841 hr, showing chlorophyll loss. Experiment was performed three times with the same results, one  
842 representative experiment shown. Scale bar = 7 mm. (b) Quantification of chlorophyll content  
843 at different MV concentrations. Results are presented as means  $\pm$ SD (N=4). Experiment was  
844 repeated three times with similar results. One representative experiment is shown. Chlorophyll  
845 content was determined spectrophotometrically from pigments extracts of leaf disks from  
846 plants grown and treated as in panel (a). (c) Quantum efficiency of photosystem II ( $F_v F_m^{-1}$ )  
847 measured by chlorophyll fluorescence at different MV concentrations. Results are presented as

848 means  $\pm$ SD (N=8). Experiment was repeated three times with similar results. One  
849 representative experiment is shown. Chlorophyll fluorescence was measured with an Imaging  
850 PAM from one-week-old seedlings, two per well in a 96 well plate containing 180  $\mu$ l of 0.5x  
851 MS media treated with 20  $\mu$ l stock solutions to give the indicated final concentrations of MV.

852 **Fig. 3** The involvement of mitochondria in methyl viologen (MV) toxicity. (a) H<sub>2</sub>O<sub>2</sub>  
853 accumulation in wild type (Col-0) and the *radical-induced cell death1* (*rcd1*) mutant induced  
854 by 1  $\mu$ M methyl viologen (MV) and a 2 hr light pre-treatment as visualized with 5 hrs of  
855 diaminobenzidine (DAB) staining in the dark. Experiments repeated two times with similar  
856 results and one representative experiment shown. Separate images of stained plants are  
857 composited and separated by black lines. Images cut from one single photo of all treatments,  
858 which is presented in Fig. S4. Black scale bar = 1 cm and is valid for all images. (b) MV-  
859 induced ROS sensitivity of mitochondrial *MnSOD* silenced RNAi lines. Root length in the light  
860 or hypocotyl length in the dark were quantified from eight or nine days old seedlings grown on  
861 0.5x MS plates (with 1% sucrose) with or without 0.1  $\mu$ M MV and the results are presented as  
862 means  $\pm$ SD (N=30) of the ratio between MV treated to control expressed as a percentage (%  
863 control). Experiment was repeated three times and results were pooled and analysed. Asterisks  
864 show statistical significance (P<0.05) from *post-hoc* analysis by computing contrasts from  
865 linear models and subjecting the P values to single-step error correction. (c) Quantification of  
866 root length in the light (d) and hypocotyl length in the dark at 0.1  $\mu$ M MV with different sucrose  
867 concentrations. Results are presented as means  $\pm$ SD (N=24) of the ratio between MV treated  
868 to its respective control with the same sucrose concentration, expressed as a percentage (%  
869 control). Experiment was repeated three times and results were pooled and analysed using  
870 posthoc analysis by computing contrasts from linear models and subjecting the P values to  
871 single-step error correction. Measurements were taken from eight- or nine-day-old seedlings  
872 grown on 0.5x MS plates containing the indicated concentration of sucrose and 0.1  $\mu$ M MV. (e)  
873 Heat map depicting the expression of MV-response genes in the following treatments: methyl  
874 viologen (MV), inhibitors of mitochondrial function (Antimycin A and Oligomycin) and  
875 chloroplast stress (Norflurazon and high light). For comparison, the marker genes *PR-1*, *PR-2*  
876 (*SA*) and *PDF1.2* (*JA*) were also included. Magenta indicates increased expression and green  
877 decreased expression. The full gene list with AGI codes can be found in Table S2a. (f) Overlap  
878 between RCD1-regulated genes and mitochondrial dysfunction stimulon (MDS) genes  
879 regulated by ANAC013. Genes regulated downstream of RCD1 are from Jaspers *et al* (2009).

880 MDS genes are as defined by De Clercq *et al.* (2013). List of genes, AGI codes, and their  
881 functional descriptions can be found in Table S2b.

882 **Fig. 4** Chloroplast adaptation to ROS-inducing treatments. (a) Time course of high light  
883 induced decreases in quantum efficiency ( $F_v F_m^{-1}$ ) of photosystem II (PSII); measured by  
884 chlorophyll fluorescence in plants exposed to repeated pulses of high light ( $1200 \mu\text{M}$  photons  
885  $\text{m}^{-2} \text{s}^{-1}$  for 60 min followed by a 25 min dark adaptation) in wild type (Col-0) and *radical-*  
886 *induced cell death1* (*rcd1*) mutant plants. Chlorophyll fluorescence was measured with an  
887 Imaging PAM from one-week-old seedlings. Results are expressed as means  $\pm$  SD ( $n=15$ ), four  
888 biological repeats were done and one representative experiment is shown. (b) Abundance of  
889 chloroplast photosynthetic complexes as determined by protein immunoblotting. Seedlings  
890 were germinated and grown on MS plates with or without  $0.4 \mu\text{M}$  methyl viologen (MV). Total  
891 protein extracts loaded on equal chlorophyll basis were separated by SDS-PAGE and blotted  
892 with anti-PsaB and anti-PsbD antibodies to assess the amounts of PSI and PSII, accordingly.  
893 Light harvesting antennae were analysed with anti-LhcA2 and anti-LhcB2 antibodies. The  
894 RCD1 paralog SIMILAR TO RCD-One (SRO1) is included here as a control. Experiment was  
895 performed twice with the same results with one representative experiment shown.

896 **Fig. 5** Natural variation in methyl viologen (MV)-induced ROS sensitivity in the light and dark.  
897 Roots lengths (a) or hypocotyl lengths (b) presented as percent of control of light or dark grown  
898 accessions in  $0.1 \mu\text{M}$  MV. Results are presented as means  $\pm$ SD ( $N=33$ ) of the ratio between  
899 MV treated to control root/hypocotyl lengths expressed as a percentage (% control).  
900 Experiment was repeated three times and results were pooled and analysed with posthoc  
901 analysis by computing contrasts from linear models and subjecting the P values to single-step  
902 error correction. Root lengths and hypocotyl were determined from eight or nine day old  
903 seedlings grown on 0.5x MS plates 1% sucrose and  $0.1 \mu\text{M}$  MV in the light (a) and dark (b)  
904 respectively. (c) Quantitative trait loci (QTL) mapping in a Kondara $\times$ Ler recombinant inbred  
905 line (RIL) population. Three separate MV traits were used: light root length (dashed lines);  
906 dark hypocotyl length (solid line) and chlorophyll fluorescence (quantum efficiency of  
907 photosystem II expressed as  $F_v F_m^{-1}$ ; dotted lines). The genome-wide LOD threshold (horizontal  
908 line) for a QTL significance ( $P < 0.05$ ) was calculated with 10 000 permutations and an average  
909 over the three traits is presented here (LOD = 2.4). QTL analysis was performed on the means  
910 of three biological repeats. Sample numbers were as follows; mapping in the light,  $n=12-20$ ,  
911 mapping in the dark,  $n= 12-20$ , mapping with chlorophyll fluorescence,  $n=15-20$ . The positions  
912 of genes used in this study are indicated in black on top of the chromosomes; MV response

913 genes previously identified by QTL mapping or forward genetics are indicated in red. For  
914 names, AGI codes, and references for the genes depicted in panel (c) see Table S3.

915 **Fig. 6** Methyl viologen (MV) response of hormone mutants in light and dark conditions.  
916 Reverse genetic experiments with single mutants related to salicylic acid (SA), jasmonic acid  
917 (JA), ethylene (ET) and reactive oxygen species (ROS) in (a). Results for *rcd1* double mutants  
918 are presented in (b) with root length assayed the light (left panel) and hypocotyl length in the  
919 dark (right panel). Results for abscisic acid (ABA) are presented in (c). Results are presented  
920 as means  $\pm$ SD (N=32) of the ratio between MV treated to control (plants grown on identical  
921 plates without MV) lengths expressed as a percentage (% control). Experiment was repeated  
922 four times and results were pooled and analysed. Statistical significance was calculated from  
923 posthoc analysis by computing contrasts from linear models and subjecting the P values to  
924 single-step error correction. Measurements were from eight- or nine-day-old seedlings grown  
925 in the light or dark on 0.5x MS plates 1% sucrose and 0.2 $\mu$ M MV in panel (b) and 0.1 $\mu$ M MV  
926 in all other panels. P-value<0.01 ‘\*\*\*’, P-value<0.01 ‘\*\*’, P-value<0.05 ‘\*’, P-value<0.1 ‘.’.  
927 List of genotypes tested, including full mutant names and AGI codes, is available in Table S4.

928 **Fig. 7** Protection from methyl viologen (MV) damage by phytohormones. (a) The  
929 phytohormones abscisic acid (ABA), salicylic acid (SA) and methyl jasmonic acid (JA), but  
930 not the ethylene precursor 1-aminocyclopropane-1-carboxylic acid (ACC), could protect plant  
931 from MV. Col-0 seedlings were pre-treated with hormones (0.2 mM) or water control (H<sub>2</sub>O)  
932 for 12 hr before adding MV (0.25 mM) or water. Photos were taken 6 and 12 hr after MV  
933 treatment. Plants were one-week-old seedlings, grown one per well in a 96 well plate  
934 containing 180  $\mu$ l of 0.5x MS media treated with 20  $\mu$ l solutions containing MV. Experiment  
935 was repeated three times with similar results. One representative experiment is shown. (b) False  
936 colour image of quantum efficiency of photosystem II values ( $F_v F_m^{-1}$ ) measured from  
937 chlorophyll fluorescence of seedlings treated as in (a). Chlorophyll fluorescence was measured  
938 with an Imaging PAM from seedlings 6 hr after MV treatment. Growth and treatment was as  
939 in (a). Experiment was repeated three times with similar results. One representative experiment  
940 is shown. (c) Quantification of quantum efficiency eight hr after MV treatment. Results are  
941 presented as means  $\pm$ SD (N=24). Experiment repeated three times with similar results. One  
942 representative experiment is shown. Growth and treatment was as in (a).

943 **Fig. 8** Model of methyl viologen (MV)-induced ROS signalling. Diagram depicting a proposed  
944 signalling network where MV-induced ROS formation in either the mitochondria or

945 chloroplast results in ROS signals that trigger retrograde signalling back to the nucleus, which  
946 in turn activates stress responsive transcriptional programs responsible for adaptive responses  
947 in both organelles. Lines with a question mark indicate two processes suggested but not proven  
948 by the data in this work; MV-induced mitochondrial ROS formation and the nature of the  
949 functional link between the mitochondria and chloroplast. RADICAL-INDUCED CELL  
950 DEATH1 (RCD1), Manganese (mitochondrial) SUPEROXIDE DISMUTASE (MnSOD).

951

952

953

954

955

956

957

958

959

960

961

962

963

964

965

966

967

968

Figure 1

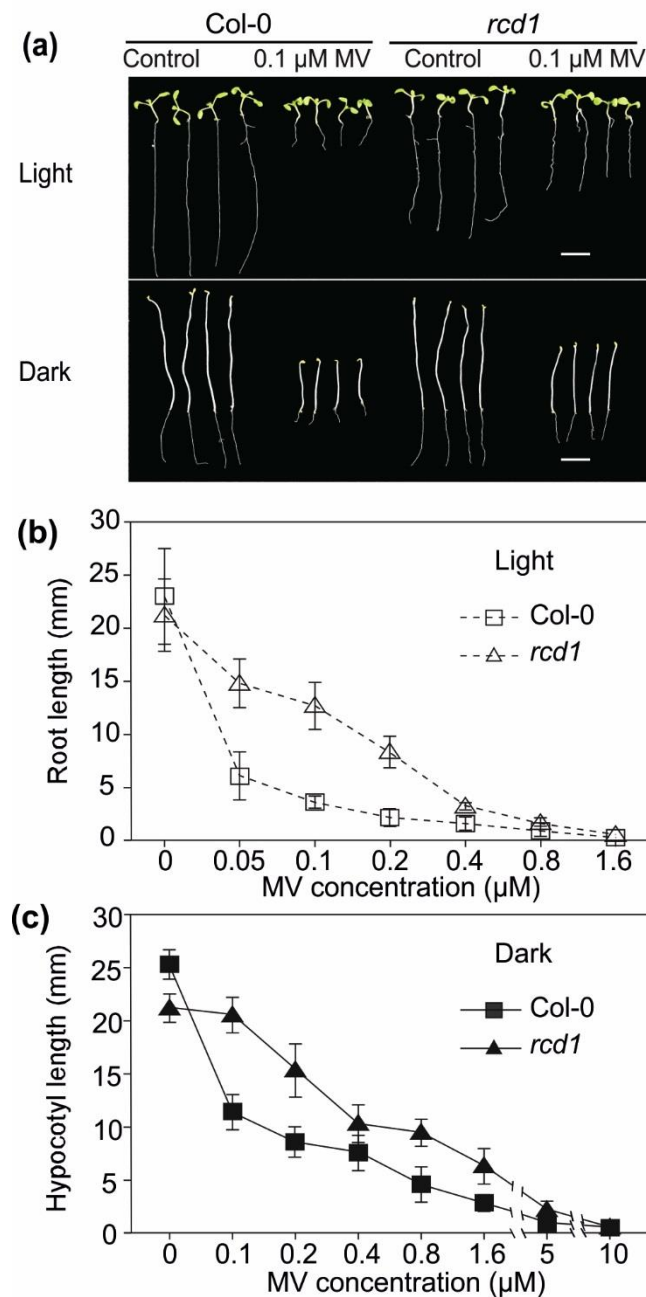

969

970 **Fig. 1** Methyl viologen (MV)-induced growth inhibition in light and dark. (a) Wild type (Col-0) and  
971 the *radical-induced cell death1* (*rcd1*) mutant after eight or nine days of growth on 0.1μM MV or  
972 control plates. Scale bar = 1 cm, N=12. (b) Quantification of root length in the light (c) or hypocotyl  
973 length in the dark at different MV concentrations. Results are presented as means ±SD (N=15). Wild  
974 type Col-0 and *rcd1* were grown eight or nine days in the light or dark on plates containing MV at the  
975 indicated concentrations, they were photographed and root or hypocotyl lengths quantified using  
976 ImageJ. All experiments were repeated three times with similar results and one representative  
977 experiment is shown.



Figure 2

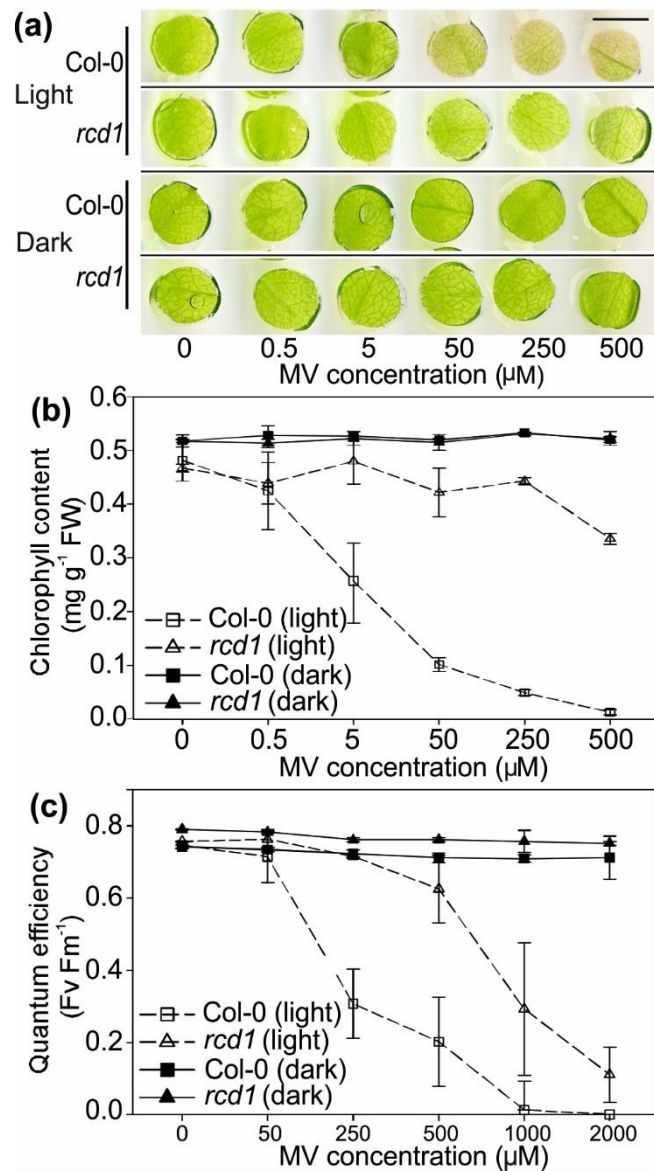

978

979 **Fig. 2** Methyl viologen (MV)-induced chloroplast damage in light and dark. (a) Leaf disks cut from  
 980 three-week-old soil grown wild type (Col-0) and *radical-induced cell death1* (*rcd1*) mutant plants were  
 981 treated *in vitro* with different concentrations of MV in light or dark for 16 hr, showing chlorophyll loss.  
 982 Experiment was performed three times with the same results, one representative experiment shown.  
 983 Scale bar = 7 mm. (b) Quantification of chlorophyll content at different MV concentrations. Results are  
 984 presented as means  $\pm$ SD (N=4). Experiment was repeated three times with similar results. One  
 985 representative experiment is shown. Chlorophyll content was determined spectrophotometrically from  
 986 pigments extracts of leaf disks from plants grown and treated as in panel (a). (c) Quantum efficiency of  
 987 photosystem II (F<sub>v</sub> F<sub>m</sub><sup>-1</sup>) measured by chlorophyll fluorescence at different MV concentrations. Results  
 988 are presented as means  $\pm$ SD (N=8). Experiment was repeated three times with similar results. One  
 989 representative experiment is shown. Chlorophyll fluorescence was measured with an Imaging PAM  
 990 from one-week-old seedlings, two per well in a 96 well plate containing 180 μl of 0.5x MS media treated  
 991 with 20 μl stock solutions to give the indicated final concentrations of MV.

Figure 3

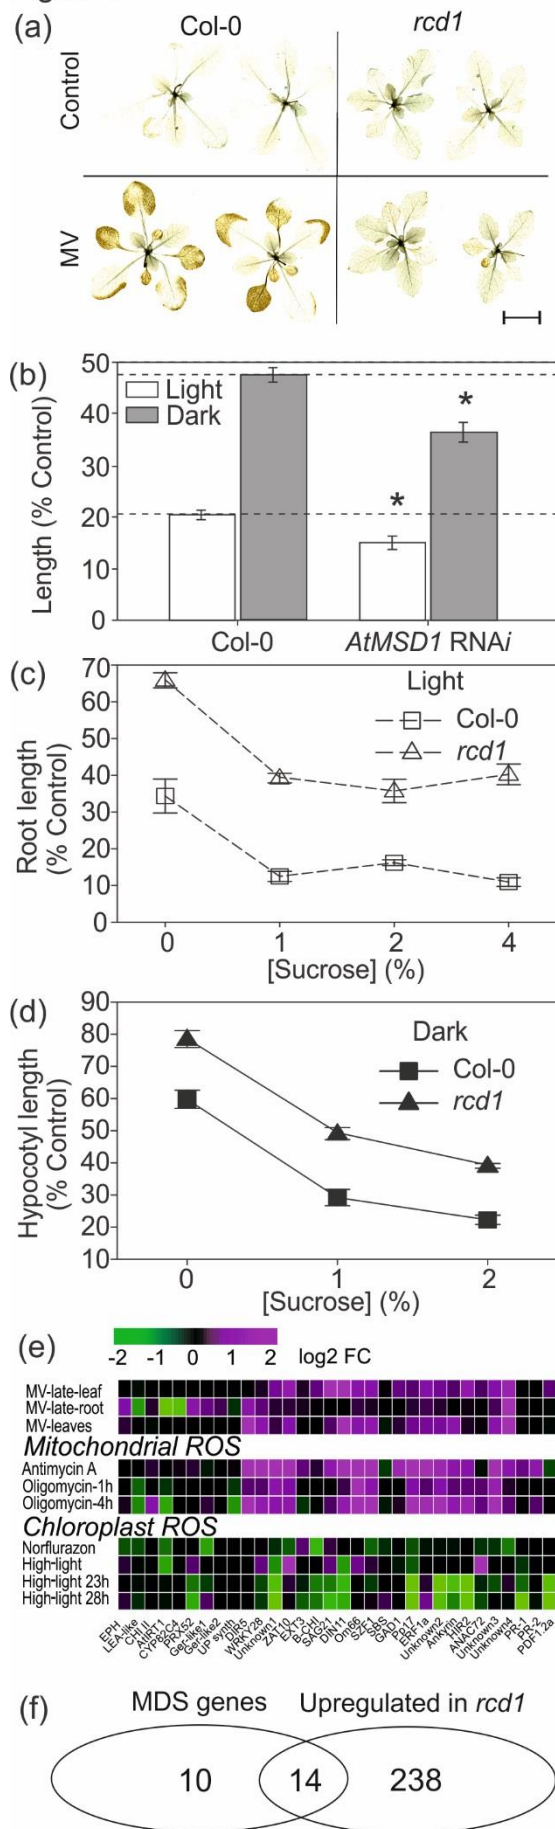

**Fig. 3** The involvement of mitochondria in methyl viologen (MV) toxicity. (a) H<sub>2</sub>O<sub>2</sub> accumulation in wild type (Col-0) and the *radical-induced cell death1* (*rcd1*) mutant induced by 1 μM methyl viologen (MV) and a 2 hr light pre-treatment as visualized with 5 hrs of diaminobenzidine (DAB) staining in the dark. Experiments repeated two times with similar results and one representative experiment shown. Separate images of stained plants are composited and separated by black lines. Images cut from one single photo of all treatments, which is presented in Fig. S4. Black scale bar = 1 cm and is valid for all images. (b) MV-induced ROS sensitivity of mitochondrial *MnSOD* silenced RNAi lines. Root length in the light or hypocotyl length in the dark were quantified from eight or nine days old seedlings grown on 0.5x MS plates (with 1% sucrose) with or without 0.1 μM MV and the results are presented as means ±SD (N=30) of the ratio between MV treated to control expressed as a percentage (% control). Experiment was repeated three times and results were pooled and analysed. Asterisks show statistical significance (P<0.05) from *post-hoc* analysis by computing contrasts from linear models and subjecting the P values to single-step error correction. (c) Quantification of root length in the light (d) and hypocotyl length in the dark at 0.1μM MV with different sucrose concentrations. Results are presented as means ±SD (N=24) of the ratio between MV treated to its respective control with the same sucrose concentration, expressed as a percentage (% control). Experiment was repeated three times and results were pooled and analysed using posthoc analysis by computing contrasts from linear models and subjecting the P values to single-step error correction. Measurements were taken from eight- or nine-day-old seedlings grown on 0.5x MS plates containing the indicated concentration of sucrose and 0.1μM MV. (e) Heat map depicting the expression of MV-response genes in the following treatments: methyl viologen (MV), inhibitors of mitochondrial function (Antimycin A and Oligomycin) and chloroplast stress (Norflurazon and high light). For comparison, the marker genes *PR-1*, *PR-2* (SA) and *PDF1.2* (JA) were also included. Magenta indicates increased expression and green decreased expression. The full gene list with AGI codes can be found in Table S2a. (f) Overlap between RCD1-regulated genes and mitochondrial dysfunction stimulon (MDS) genes regulated by ANAC013. Genes regulated downstream of RCD1 are from Jaspers *et al.* (2009). MDS genes are as defined by De Clercq *et al.* (2013). List of genes, AGI codes, and their functional descriptions can be found in Table S2b.

Figure 4

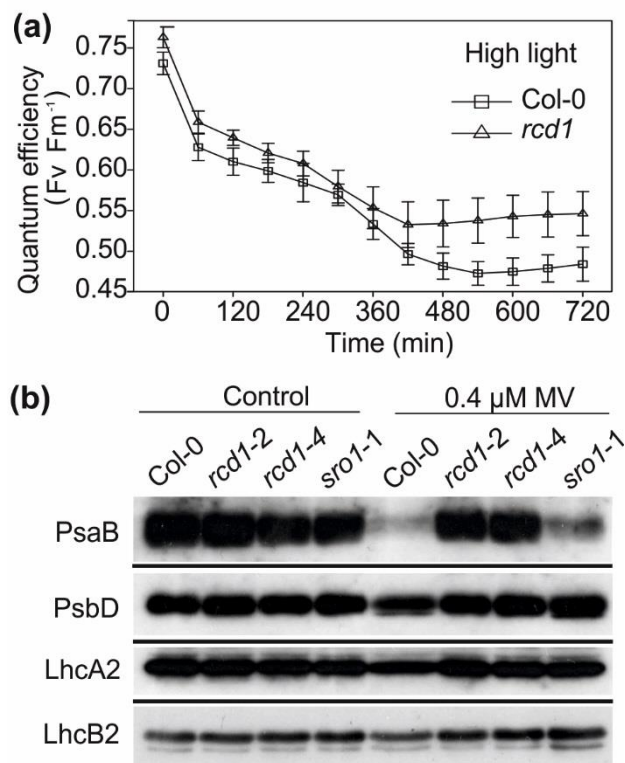

993

994 **Fig. 4** Chloroplast adaptation to ROS-inducing treatments. (a) Time course of high light induced  
995 decreases in quantum efficiency ( $F_v/F_m$ ) of photosystem II (PSII); measured by chlorophyll  
996 fluorescence in plants exposed to repeated pulses of high light ( $1200 \mu\text{M photons m}^{-2} \text{s}^{-1}$  for 60 min  
997 followed by a 25 min dark adaptation) in wild type (Col-0) and *radical-induced cell death1* (*rcd1*)  
998 mutant plants. Chlorophyll fluorescence was measured with an Imaging PAM from one-week-old  
999 seedlings. Results are expressed as means  $\pm$  SD ( $n=15$ ), four biological repeats were done and one  
1000 representative experiment is shown. (b) Abundance of chloroplast photosynthetic complexes as  
1001 determined by protein immunoblotting. Seedlings were germinated and grown on MS plates with or  
1002 without 0.4  $\mu\text{M}$  methyl viologen (MV). Total protein extracts loaded on equal chlorophyll basis were  
1003 separated by SDS-PAGE and blotted with anti-PsaB and anti-PsbD antibodies to assess the amounts of  
1004 PSI and PSII, accordingly. Light harvesting antennae were analysed with anti-LhcA2 and anti-LhcB2  
1005 antibodies. The RCD1 paralog SIMILAR TO RCD-One (SRO1) is included here as a control.  
1006 Experiment was performed twice with the same results with one representative experiment shown.

1007

1008

1009

1010

1011

1012

Figure 5

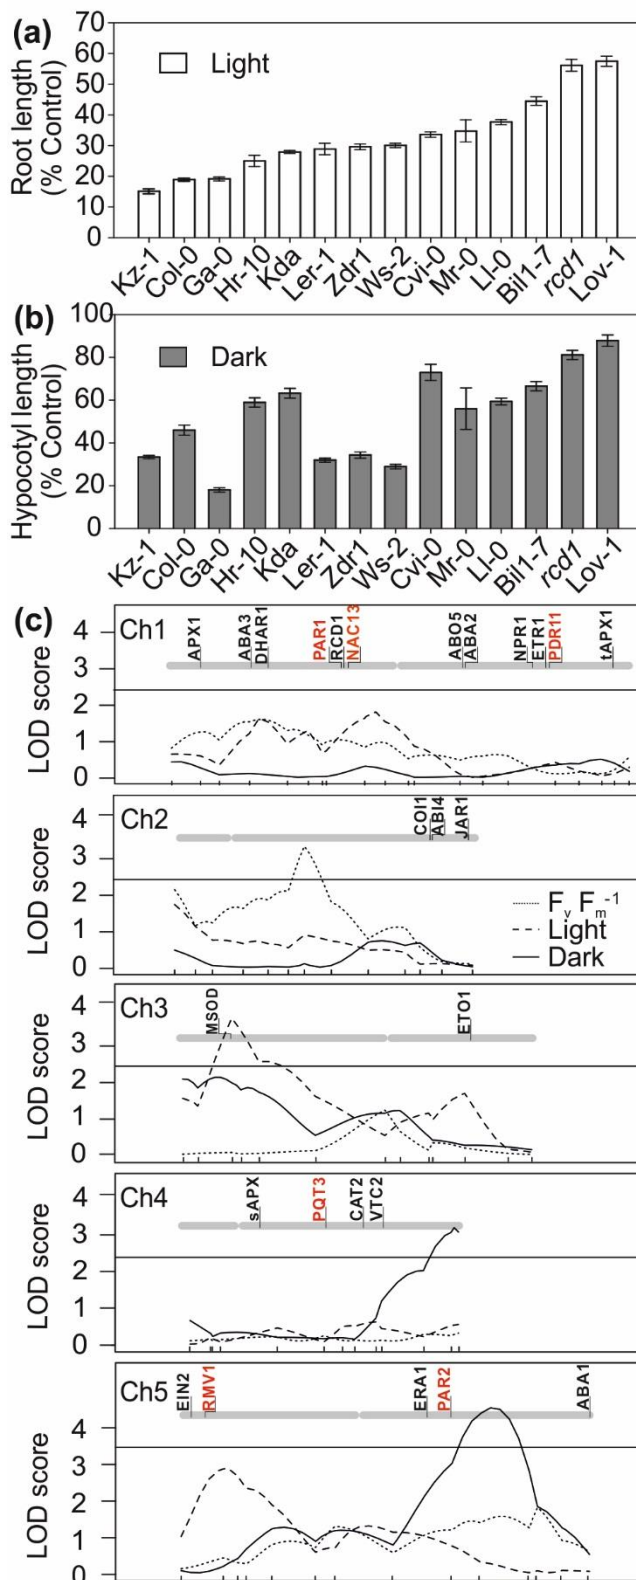

**Fig. 5** Natural variation in methyl viologen (MV)-induced ROS sensitivity in the light and dark. Roots lengths (a) or hypocotyl lengths (b) presented as percent of control of light or dark grown accessions in 0.1  $\mu$ M MV. Results are presented as means  $\pm$ SD (N=33) of the ratio between MV treated to control root/hypocotyl lengths expressed as a percentage (% control). Experiment was repeated three times and results were pooled and analysed with posthoc analysis by computing contrasts from linear models and subjecting the P values to single-step error correction. Root lengths and hypocotyl were determined from eight or nine day old seedlings grown on 0.5x MS plates 1% sucrose and 0.1  $\mu$ M MV in the light (a) and dark (b) respectively. (c) Quantitative trait loci (QTL) mapping in a Kondara $\times$ Ler recombinant inbred line (RIL) population. Three separate MV traits were used: light root length (dashed lines); dark hypocotyl length (solid line) and chlorophyll fluorescence (quantum efficiency of photosystem II expressed as F<sub>v</sub>/F<sub>m</sub><sup>-1</sup>; dotted lines). The genome-wide LOD threshold (horizontal line) for a QTL significance (P < 0.05) was calculated with 10 000 permutations and an average over the three traits is presented here (LOD = 2.4). QTL analysis was performed on the means of three biological repeats. Sample numbers were as follows; mapping in the light, n=12-20, mapping in the dark, n= 12-20, mapping with chlorophyll fluorescence, n=15-20. The positions of genes used in this study are indicated in black on top of the chromosomes; MV response genes previously identified by QTL mapping or forward genetics are indicated in red. For names, AGI codes, and references for the genes depicted in panel (c) see Table S3.

**Figure 6**

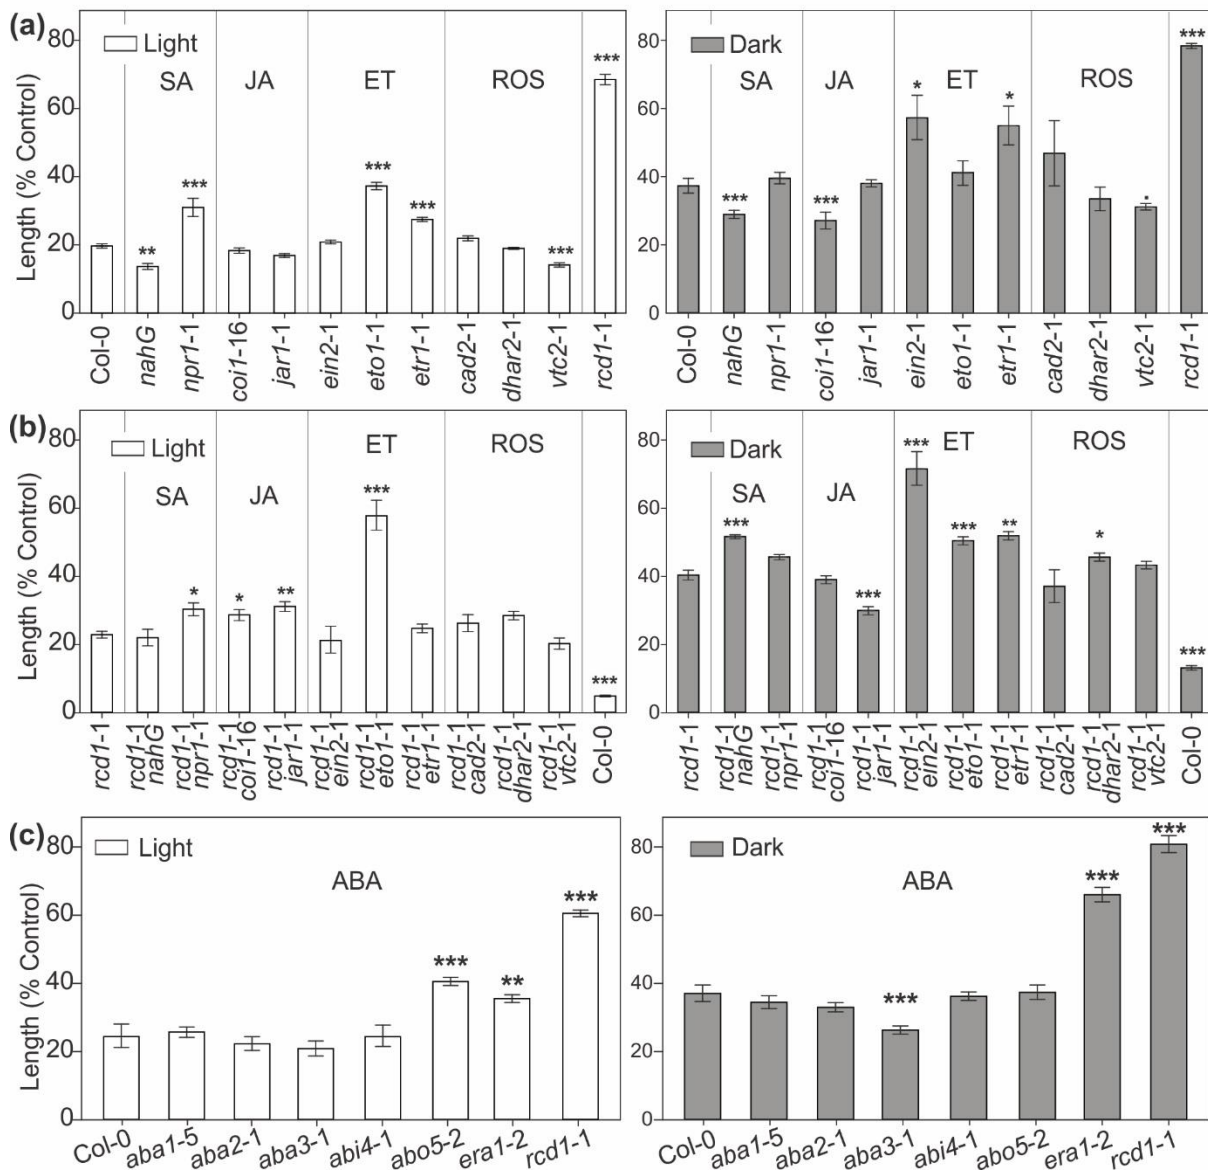

1014

1015 **Fig. 6** Methyl viologen (MV) response of hormone mutants in light and dark conditions. Reverse genetic  
 1016 experiments with single mutants related to salicylic acid (SA), jasmonic acid (JA), ethylene (ET) and  
 1017 reactive oxygen species (ROS) in (a). Results for *rcd1* double mutants are presented in (b) with root  
 1018 length assayed the light (left panel) and hypocotyl length in the dark (right panel). Results for abscisic  
 1019 acid (ABA) are presented in (c). Results are presented as means  $\pm$ SD (N=32) of the ratio between MV  
 1020 treated to control (plants grown on identical plates without MV) lengths expressed as a percentage (%  
 1021 control). Experiment was repeated four times and results were pooled and analysed. Statistical  
 1022 significance was calculated from posthoc analysis by computing contrasts from linear models and  
 1023 subjecting the P values to single-step error correction. Measurements were from eight- or nine-day-old  
 1024 seedlings grown in the light or dark on 0.5x MS plates 1% sucrose and 0.2 $\mu$ M MV in panel (b) and  
 1025 0.1 $\mu$ M MV in all other panels. P-value<0.01 ‘\*\*\*’, P-value<0.01 ‘\*\*’, P-value<0.05 ‘\*’, P-value<0.1  
 1026 ‘.’. List of genotypes tested, including full mutant names and AGI codes, is available in Table S4.

1027

1028

**Figure 7**

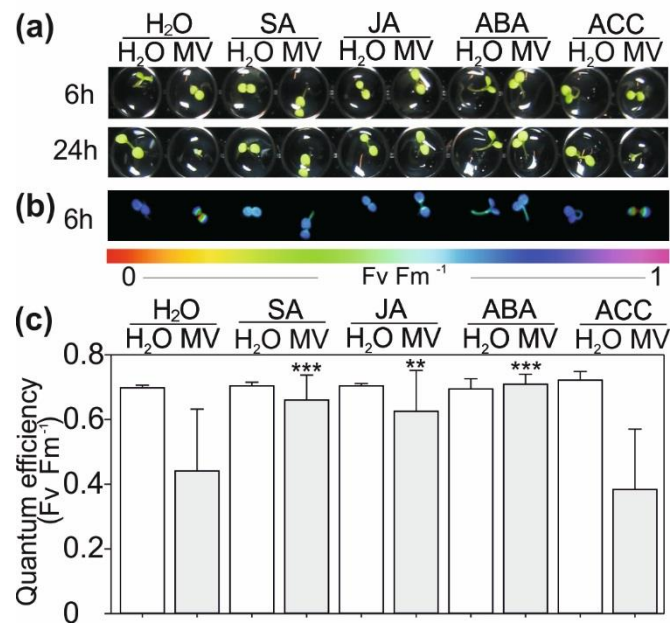

1029

1030 **Fig. 7** Protection from methyl viologen (MV) damage by phytohormones. (a) The phytohormones  
 1031 abscisic acid (ABA), salicylic acid (SA) and methyl jasmonic acid (JA), but not the ethylene precursor  
 1032 1-aminocyclopropane-1-carboxylic acid (ACC), could protect plant from MV. Col-0 seedlings were  
 1033 pre-treated with hormones (0.2 mM) or water control (H<sub>2</sub>O) for 12 hr before adding MV (0.25 mM) or  
 1034 water. Photos were taken 6 and 12 hr after MV treatment. Plants were one-week-old seedlings, grown  
 1035 one per well in a 96 well plate containing 180 μl of 0.5x MS media treated with 20 μl solutions  
 1036 containing MV. Experiment was repeated three times with similar results. One representative  
 1037 experiment is shown. (b) False colour image of quantum efficiency of photosystem II values (F<sub>v</sub>/F<sub>m</sub><sup>-1</sup>)  
 1038 measured from chlorophyll fluorescence of seedlings treated as in (a). Chlorophyll fluorescence was  
 1039 measured with an Imaging PAM from seedlings 6 hr after MV treatment. Growth and treatment was as  
 1040 in (a). Experiment was repeated three times with similar results. One representative experiment is  
 1041 shown. (c) Quantification of quantum efficiency eight hr after MV treatment. Results are presented as  
 1042 means ±SD (N=24). Experiment repeated three times with similar results. One representative  
 1043 experiment is shown. Growth and treatment was as in (a).

1044

1045

1046

1047

1048

1049

1050

1051

**Figure 8**

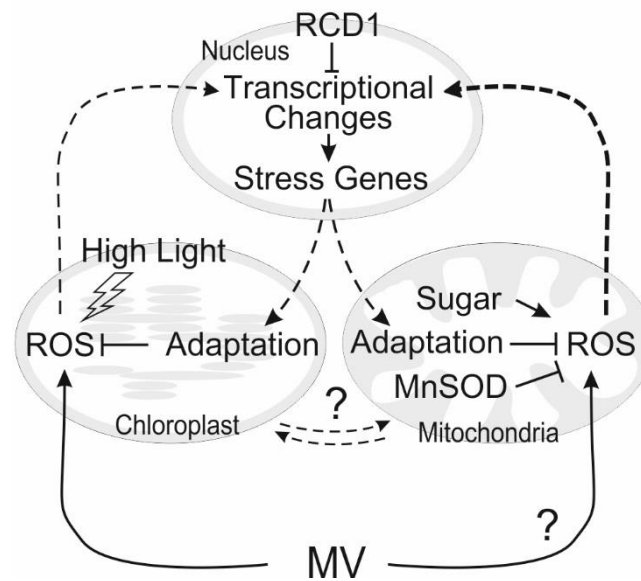

1052

1053 **Fig. 8** Model of methyl viologen (MV)-induced ROS signalling. Diagram depicting a proposed  
1054 signalling network where MV-induced ROS formation in either the mitochondria or chloroplast results  
1055 in ROS signals that trigger retrograde signalling back to the nucleus, which in turn activates stress  
1056 responsive transcriptional programs responsible for adaptive responses in both organelles. Lines with  
1057 a question mark indicate two processes suggested but not proven by the data in this work; MV-induced  
1058 mitochondrial ROS formation and the nature of the functional link between the mitochondria and  
1059 chloroplast. RADICAL-INDUCED CELL DEATH1 (RCD1), Manganese (mitochondrial)  
1060 SUPEROXIDE DISMUTASE (MnSOD).

1061

1062

1063

1064

1065
